# Supplementary material for: Unlocking the significance of high H2O resistance for nickel vanadate phases to improve the kinetic parameters or consequences of catalytic NOX reduction and poison pyrolysis
Source: Royal Society of Chemistry journal article supplement (doi:10.1039/d3ta01977b), 2023-01-01
Supplement: d3ta01977b1.pdf [file d3ta01977b1.pdf]

**Supporting Information**

**Title:** Unlocking the Significance of High H<sub>2</sub>O Resistance for Nickel Vanadate Phases to Improve Kinetic Parameters or Consequences of Catalytic NO<sub>x</sub> Reduction and Poison Pyrolysis

**Authors:** Seokhyun Lee,<sup>ab</sup> Heon Phil Ha,<sup>a</sup> Jung-Hyun Lee,<sup>b</sup> and Jongsik Kim<sup>c\*</sup>

\* jkim40@khu.ac.kr; Tel.: (+82) 31-201-2444.

**Affiliations:**

<sup>a</sup> Extreme Materials Research Center, Korea Institute of Science and Technology, Seoul, 02792, South Korea.

<sup>b</sup> Department of Chemical & Biological Engineering, Korea University, Seoul, 02841, South Korea.

<sup>c</sup> Department of Chemical Engineering, Kyung Hee University, Yongin, 17104, South Korea.

**Table of Contents**

|                                   |                |
|-----------------------------------|----------------|
| <b>Experimental section</b> ..... | <b>S2-S5</b>   |
| <b>Table S1-S9</b> .....          | <b>S6-S15</b>  |
| <b>Fig. S1-S20</b> .....          | <b>S16-S35</b> |
| <b>References</b> .....           | <b>S36</b>     |

## Experimental section

### Catalysts

The catalysts were synthesized using wet impregnation technique, whose procedures depicted in our previous studies<sup>1-4</sup> were slightly modified. In the case of TiO<sub>2</sub>-supported Ni<sub>1</sub>V<sub>2</sub>O<sub>6</sub> (Ni<sub>1</sub>), Ni<sub>2</sub>V<sub>2</sub>O<sub>7</sub> (Ni<sub>2</sub>), or Ni<sub>3</sub>V<sub>2</sub>O<sub>8</sub> (Ni<sub>3</sub>) catalyst, 'A' g of TiO<sub>2</sub> (DT51, CristalACTIV™) was mixed with 170 mL of de-ionized H<sub>2</sub>O and stirred at 25 °C for half an hour before being further mixed with 2.36 mmol of NH<sub>4</sub>VO<sub>3</sub> (≥ 99.0 %, Junsei) and 2.36 mmol of (COOH)<sub>2</sub>·2H<sub>2</sub>O (oxalic acid, 99.5-100 %, Junsei), both of which were dissolved in 70 mL of de-ionized H<sub>2</sub>O (A of 5.81 g for Ni<sub>1</sub>; 5.74 g for Ni<sub>2</sub>; 5.67 g for Ni<sub>3</sub>). The resulting mixture was then stirred at 25 °C for half an hour, mixed with 'B' mmol of Ni(NO<sub>3</sub>)<sub>2</sub>·3H<sub>2</sub>O (≥ 97.0 %, Junsei) dissolved in 70 mL of de-ionized H<sub>2</sub>O, stirred at 25 °C for 18 hours, subjected to rotary evaporation for the removal of de-ionized H<sub>2</sub>O, dried at 110 °C for 18 hours, and calcined at 500 °C for 5 hours with a ramping rate of 5 °C min<sup>-1</sup> (B of 1.18 mmol for Ni<sub>1</sub>; 2.36 mmol for Ni<sub>2</sub>; 3.54 mmol for Ni<sub>3</sub>). Meanwhile, 12.3 mmol of Sb(CH<sub>3</sub>COO)<sub>3</sub> (≥ 97.0 %, Alfa Aesar) was dissolved in 500 mL of CH<sub>3</sub>COOH (acetic acid, 99.5-100.5 %, J. T. Baker), stirred at 25 °C for half an hour, mixed with 48.5 g of TiO<sub>2</sub>, stirred at 25 °C for 18 hours, subjected to rotary evaporation for the removal of acetic acid, dried at 110 °C for 18 hours, and calcined at 500 °C for 5 hours with a ramping rate of 5 °C min<sup>-1</sup> for the production of antimony oxide supported on TiO<sub>2</sub> (Sb/TiO<sub>2</sub>).<sup>1-4</sup> Sb-promoted Ni<sub>1</sub> catalyst (Ni<sub>1</sub>-Sb) was then synthesized according to the protocols identical to those utilized to synthesize Ni<sub>1</sub> except for the use of Sb/TiO<sub>2</sub> as a support. WO<sub>3</sub>-promoted V<sub>2</sub>O<sub>5</sub> supported on TiO<sub>2</sub> (V<sub>2</sub>O<sub>5</sub>-WO<sub>3</sub>) was synthesized according to the protocols we reported elsewhere<sup>1, 2, 4</sup> and served to simulate a commercial catalyst. The catalyst finally underwent surface modification with SO<sub>4</sub><sup>2-</sup>/HSO<sub>4</sub><sup>-</sup> (Z= 3-4) functionalities, for which the catalyst was exposed to 500 ppm SO<sub>2</sub>/3 vol. % O<sub>2</sub>/N<sub>2</sub> at 500 °C for an hour with a total flow rate of 500 mL min<sup>-1</sup> and a ramping rate of 10 °C min<sup>-1</sup>.<sup>1-6</sup> This led to the generation of SO<sub>4</sub><sup>2-</sup>/HSO<sub>4</sub><sup>-</sup>-modified Ni<sub>1</sub> (Ni<sub>1</sub>-S), Ni<sub>2</sub> (Ni<sub>2</sub>-S), Ni<sub>3</sub> (Ni<sub>3</sub>-S), Ni<sub>1</sub>-Sb (Ni<sub>1</sub>-Sb-S), or V<sub>2</sub>O<sub>5</sub>-WO<sub>3</sub> (V<sub>2</sub>O<sub>5</sub>-WO<sub>3</sub>-S).

### Characterizations

X-ray diffraction (XRD) patterns of the catalysts were acquired on a D8 Advance diffractometer (Bruker) with the analytic conditions of 20-80° for 2θ range, 0.02° per step for step size, 2 seconds per step for scan speed in addition to the use of Cu K<sub>α</sub> radiation with the wavenumber of 0.154 nm. X-ray fluorescence (XRF) analysis of the catalysts were performed on a ZSX Primus II spectrometer (Rigaku). High-resolution transmission electron microscopy (HRTEM) images and selected area electron diffraction (SAED) patterns of the catalysts were acquired on a Titan 80-300™ (FEI) with the acceleration voltage of 300 keV after the catalyst surfaces were purged under vacuum (~10<sup>-7</sup> mmHg). Energy-dispersive X-ray spectroscopy (EDX) mapping images of the catalysts were acquired using an Ultim max 170 (Oxford) at 15 kV after the catalyst surfaces were purged under vacuum (~10<sup>-6</sup> mmHg). X-ray photoelectron spectroscopy (XPS) spectra of the catalysts were acquired with the resolution of 0.05 eV on a PHI 5000 VersaProbe after the catalyst surfaces were purged under vacuum (~10<sup>-4</sup> mmHg). XPS spectra of the catalysts were curve-fitted using Gaussian function, with which adventitious carbon band situated at binding energy centered at ~284.6 eV was used as a reference to correct binding energies of XPS spectra in the Ni 2p, V 2p, S 2p, and O 1s regimes. (See Table S2.) Temperature-resolved Raman spectra of the catalysts were acquired under a N<sub>2</sub> at 25 °C or 220 °C with the resolution of 0.3 cm<sup>-1</sup> on an inVia Raman Microscope (Renishaw) coupled with X 50 objective lens and a 532 nm excitation laser after the catalyst surfaces were purged with a N<sub>2</sub> at 300 °C for half an hour with a total flow rate of 300 mL min<sup>-1</sup> and a ramping rate of 10 °C min<sup>-1</sup>.<sup>3</sup> Raman spectra of the catalysts were curve-fitted using Gaussian function.<sup>3</sup> N<sub>2</sub> isotherms of the catalysts were acquired on a NOVA 2200e (Quantachrome Instruments) at -196 °C after the catalyst surfaces were purged under vacuum (2 X 10<sup>-3</sup> mmHg). Brunauer-Emmett-Teller (BET) and Barrett-Joyner-Halenda (BJH) theories were utilized to evaluate N<sub>2</sub>-accessible BET surface areas (S<sub>BET, N2</sub>; mN<sub>2</sub><sup>2</sup> g<sub>CAT</sub><sup>-1</sup>) and pore volumes (V<sub>PORE, N2</sub>; cmN<sub>2</sub><sup>3</sup> g<sub>CAT</sub><sup>-1</sup>) of the catalysts, respectively, for which the catalyst surfaces were purged at 150 °C under vacuum (2 X 10<sup>-3</sup> mmHg). The quantities of N<sub>2</sub> adsorbed on the catalyst surfaces at partial pressure (P/P<sub>0</sub>) domain of 0.05-0.3 were considered to assess S<sub>BET, N2</sub> values of the catalysts.<sup>7</sup> H<sub>2</sub>O isotherms of the catalysts were acquired on a BELSORP-MAX (MicrotracBEL Corp.) at 10-40 °C. H<sub>2</sub>O-accessible BET surface areas in a per-gram basis (S<sub>BET, H2O</sub>; mH<sub>2O</sub><sup>2</sup> g<sub>CAT</sub><sup>-1</sup>) or in a per-H<sub>2</sub>O-accessible site basis (S<sub>H2O</sub>; mH<sub>2O</sub><sup>2</sup> molH<sub>2O</sub><sup>-1</sup>) for the

catalysts were evaluated with the contemplation of the numbers of H<sub>2</sub>O adsorbed on the catalyst surfaces ( $N_{H_2O}$ ; mol<sub>H<sub>2</sub>O</sub> g<sub>CAT</sub><sup>-1</sup>) at P/P<sub>0</sub> domain of 0.05-0.3 and 10 °C.<sup>8-13</sup>  $S_{H_2O}$  values of the catalysts correspond to their  $S_{BET}$ ,  $H_2O$  values divided by  $N_{H_2O}$  values at P/P<sub>0</sub> of ~1.0 and 10 °C.<sup>10-15</sup> Moreover, H<sub>2</sub>O isotherms of the catalysts were fitted using Toth equation (Eqn. S1), in which  $N_{H_2O,0}$  is referred to as the maximum amount of H<sub>2</sub>O adsorbed in a per-gram of the catalyst (mol<sub>H<sub>2</sub>O</sub> g<sub>CAT</sub><sup>-1</sup>), whereas C, D, and P indicate constant indigenous to the catalyst (bar<sup>-1</sup>), constant associated with heterogeneity of the catalyst surface (unit-less), and pressure (bar), respectively,<sup>10-15</sup> as detailed in Table S7. Isothermic heats of H<sub>2</sub>O adsorption on the catalyst surfaces at near-zero H<sub>2</sub>O coverage ( $E_{H_2O}$ ) were evaluated using Clausius-Clapeyron equation (Eqn. S2), where  $P_A/P_B$  and R are referred to as pressures (bar) at temperatures of  $T_A/T_B$  (K) and ideal gas constant (8.3145 J mol<sup>-1</sup> K<sup>-1</sup>), respectively.<sup>10, 11, 14-16</sup>

$$N_{H_2O} = N_{H_2O,0} \times \frac{C \times P}{(1 + (C \times P)^D)^{1/D}} \quad (S1)$$

$$\ln\left(\frac{P_A}{P_B}\right) = \frac{E_{H_2O}}{R} \times \left(\frac{T_A - T_B}{T_A \times T_B}\right) \quad (S2)$$

Background-subtracted *in situ* diffuse reflectance infrared Fourier transform (DRIFT) spectra of the catalysts were acquired with the resolution of 4 cm<sup>-1</sup> on an FT/IR/4200 (Jasco) equipped with KBr optics and a mercury-cadmium-telluride (MCT) detector. The catalyst was placed in a reaction cell (Harrick Scientific), purged with 3 vol. % O<sub>2</sub>/N<sub>2</sub> at 300 °C for half an hour, and exposed to 250 °C (or 500 °C) under a N<sub>2</sub> for the collection of background signal at 250 °C (or 500 °C) with a ramping rate of 10 °C min<sup>-1</sup>. Background-subtracted *in situ* DRIFT spectrum of the catalyst was then collected under 1,000 ppm NH<sub>3</sub>/N<sub>2</sub> (at 250 °C), 1,000 ppm NO/3 vol. % O<sub>2</sub>/N<sub>2</sub> (at 250 °C) or under 1,000 ppm SO<sub>2</sub>/3 vol. % O<sub>2</sub>/N<sub>2</sub> (at 500 °C) with a total flow rate of 200 mL min<sup>-1</sup>. CO-pulsed chemisorption experiments of the catalysts were conducted on an Autochem II (Micromeritics) at 50 °C, for which 10 °C min<sup>-1</sup> served as a ramping rate. The catalyst surfaces were purged with 10 vol. % O<sub>2</sub>/He at 300 °C for an hour, cooled to 50 °C under a He, and subjected to periodic CO injection at 50 °C till thermal conductivity detector (TCD) signals of CO were invariant.<sup>1-6</sup> O<sub>2</sub>-pulsed chemisorption experiments of the catalysts were also carried out on an Autochem II (Micromeritics) at 250 °C, for which 10 °C min<sup>-1</sup> served as a ramping rate.<sup>3</sup> The catalyst surfaces were purged with 10 vol. % O<sub>2</sub>/He at 300 °C for an hour, cooled to 50 °C under a He, reduced under 10 vol. % H<sub>2</sub>/He at 300 °C for an hour, cooled to 250 °C under a He, and subjected to periodic O<sub>2</sub> injection at 250 °C till TCD signals of O<sub>2</sub> were unaltered.<sup>3</sup> O<sub>2</sub>-, NH<sub>3</sub>-, or SO<sub>2</sub>-temperature-programmed desorption (TPD) profiles of the catalysts were acquired on an Autochem II (Micromeritics), an Autochem II coupled with an on-line mass spectrometer (HPR20, Hiden Analytical), or an Autochem II connected to a quartz reactor coupled with an on-line SO<sub>2</sub> analyzer (ZKJ-2 (Fuji Electric Co.)). In the case of O<sub>2</sub>-TPD experiments with a ramping rate of 10 °C min<sup>-1</sup> except for that utilized during the final stage, the catalyst surface was purged with 10 vol. % O<sub>2</sub>/He at 300 °C for an hour, cooled to 50 °C under a He, and reduced under 10 vol. % H<sub>2</sub>/He at 300 °C for an hour, cooled to 250 °C under a He, exposed to 10 vol. % O<sub>2</sub>/He at 250 °C for an hour to ensure the saturation of O<sub>2</sub>-accessible surface sites with O<sub>2</sub> prior to the exposure of the surface to a He at 250 °C for an hour to eliminate O<sub>2</sub> physisorbed on the surface.<sup>3</sup> The surface was finally heated to 600 °C under a He with a ramping rate ( $\beta$ ) of 10 °C min<sup>-1</sup>, 20 °C min<sup>-1</sup>, or 30 °C min<sup>-1</sup> for acquiring a profile of TCD signal of O<sub>2</sub> released versus temperature for the catalyst at a  $\beta$  value set.<sup>3-6, 17</sup> O<sub>2</sub>-TPD profiles at dissimilar  $\beta$  values were then curve-fitted using Gaussian function to reveal two sub-bands (denoted as I and II in Table S5) with desorption temperatures ( $T_{MAX}$ ), at which maximum intensities of TCD signals were observed.<sup>3-6, 17</sup> Binding energy between the surface and O<sub>2</sub> adsorbed ( $E_{OL/OM}$ ) was assessed with the use of TPD theory (Eqn. S3), where  $\theta_{OL/OM, MAX}$  and  $v_n/n$  are referred to as surface O<sub>2</sub> coverage at  $T_{MAX}$  and lumped constants indigenous to the surface, respectively.<sup>3-6, 17</sup> Plot of  $\ln(\beta/T_{MAX}^2)$  versus  $(1/T_{MAX})$  for sub-band I or II provided a slope identical to  $(-E_{OL/OM}/R)$  with the postulation concerning the independence of  $E_{OL/OM}$  on  $\theta_{OL/OM, MAX}$  (Table S5).<sup>3-6, 17</sup>

$$\ln\left(\frac{\beta}{T_{MAX}^2}\right) = -\left(\frac{E_{OL/OM}}{R}\right)\left(\frac{1}{T_{MAX}}\right) - 2.303 \times \log\left(\frac{E_{OL/OM}}{v_n R n \theta_{OL/OM, MAX}^{n-1}}\right) \quad (S3)$$

In the case of NH<sub>3</sub>-TPD experiments with NH<sub>3</sub> chemisorption at 150 °C and a ramping rate of 10 °C min<sup>-1</sup> except for that utilized during the final stage, the catalyst surface was purged with 10 vol. % O<sub>2</sub>/He at 300 °C for an

hour, cooled to 150 °C under a He, exposed to 5 vol. % NH<sub>3</sub>/He at 150 °C for an hour to ensure the saturation of NH<sub>3</sub>-accessible surface sites with NH<sub>3</sub> prior to the exposure of the surface to a He at 150 °C for an hour to eliminate NH<sub>3</sub> physisorbed on the surface.<sup>3-6, 17</sup> The surface was finally heated to 700 °C under a He with a ramping rate ( $\beta$ ) of 10 °C min<sup>-1</sup>, 20 °C min<sup>-1</sup>, or 30 °C min<sup>-1</sup> for acquiring a profile of NH<sub>3</sub> ( $m/z \sim 17$ ) signal released versus temperature for the catalyst at a  $\beta$  value set.<sup>3-6, 17</sup> NH<sub>3</sub>-TPD profiles at dissimilar  $\beta$  values were then curve-fitted using Gaussian function to reveal three sub-bands (denoted as I, II, and III in Table S3) with desorption temperatures ( $T_{MAX}$ ), at which maximum intensities of NH<sub>3</sub> ( $m/z \sim 17$ ) signals were observed.<sup>3-6, 17</sup> Binding energy between the surface and NH<sub>3</sub> adsorbed ( $E_{NH_3}$ ) was assessed with the use of TPD theory (Eqn. S4), where  $\theta_{NH_3, MAX}$  and  $v_n/n$  are referred to as surface NH<sub>3</sub> coverage at  $T_{MAX}$  and lumped constants indigenous to the surface, respectively.<sup>3-6, 17</sup> Plot of  $\ln(\beta/T_{MAX}^2)$  versus  $(1/T_{MAX})$  for sub-band I, II, or III provided a slope identical to  $(-E_{NH_3}/R)$  with the postulation concerning the independence of  $E_{NH_3}$  on  $\theta_{NH_3, MAX}$  (Table S3).<sup>3-6, 17</sup>

$$\ln\left(\frac{\beta}{T_{MAX}^2}\right) = -\left(\frac{E_{NH_3}}{R}\right)\left(\frac{1}{T_{MAX}}\right) - 2.303 \times \log\left(\frac{E_{NH_3}}{v_n R n \theta_{NH_3, MAX}^{n-1}}\right) \quad (S4)$$

In the case of NH<sub>3</sub>-TPD experiments with NH<sub>3</sub> chemisorption at 50 °C and a ramping rate of 10 °C min<sup>-1</sup>, the catalyst surface was purged with 10 vol. % O<sub>2</sub>/He at 300 °C for an hour, cooled to 50 °C under a He, exposed to 5 vol. % NH<sub>3</sub>/He at 50 °C for an hour to ensure the saturation of NH<sub>3</sub>-accessible surface sites with NH<sub>3</sub> prior to the exposure of the surface to a He at 50 °C for an hour to eliminate NH<sub>3</sub> physisorbed on the surface. The surface was finally heated to 700 °C under a He for acquiring a profile of NH<sub>3</sub> ( $m/z \sim 17$ ) signal released versus temperature for the catalyst. In the case of SO<sub>2</sub>-TPD experiment with SO<sub>2</sub> chemisorption at 220 °C and a ramping rate of 10 °C min<sup>-1</sup>, the catalyst surface was purged with 10 vol. % O<sub>2</sub>/He at 300 °C for an hour, cooled to 220 °C under a He, exposed to 5,000 ppm SO<sub>2</sub>/N<sub>2</sub> at 220 °C for an hour to ensure the saturation of SO<sub>2</sub>-accessible surface sites with SO<sub>2</sub> prior to the exposure of the surface to a He at 220 °C for an hour to eliminate SO<sub>2</sub> physisorbed on the surface. The surface was finally heated to 900 °C under a He for acquiring a profile of SO<sub>2</sub> concentration released versus temperature for the catalyst. H<sub>2</sub>-temperature-programmed reduction (TPR) profiles of the catalysts were acquired on an Autochem II (Micromeritics). While a ramping rate was set to 10 °C min<sup>-1</sup>, the catalyst surface was purged with 10 vol. % O<sub>2</sub>/He at 300 °C for an hour, cooled to 50 °C under a He, and reduced to 900 °C under 10 vol. % H<sub>2</sub>/He for acquiring a profile of TCD signal versus temperature for the catalyst. A thermo-gravimetric analyzer (TGA2, Mettler-Toledo, denoted as TGA) equipped with an on-line mass spectrometer (HPR20, Hiden Analytical, denoted as MASS) were utilized to conduct TGA-MASS experiments of the catalysts poisoned with AS/ABS.<sup>2, 4</sup> The poisoned catalyst was situated in an Al<sub>2</sub>O<sub>3</sub> pan, purged with an Ar at 100 °C for an hour, and heated to 600 °C under an Ar with a flow rate of 50 mL min<sup>-1</sup> and a ramping rate of 2 °C min<sup>-1</sup> for acquiring a series of profiles concerning weight loss/NH<sub>3</sub> signal ( $m/z \sim 17$ )/H<sub>2</sub>O signal ( $m/z \sim 18$ )/SO<sub>2</sub> signal ( $m/z \sim 64$ ) released versus temperature for the catalyst.<sup>2, 4</sup>

## Reactions

Initially, the catalyst sieved with sizes of 200-300  $\mu\text{m}$  or 300-425  $\mu\text{m}$  was placed inside a quartz reactor with an inner diameter of 0.4 cm, wherein the amount of the catalyst loaded was altered to regulate the control volume and/or space velocity (e.g., 0.31 g/0.62 g of catalyst  $\rightarrow$  0.5 mL/1 mL of control volume  $\rightarrow$  60,000 hr<sup>-1</sup>/30,000 hr<sup>-1</sup> of space velocity). The quartz reactor was then loaded in a tube furnace, purged with 3 vol. % O<sub>2</sub>/N<sub>2</sub> at 400 °C for an hour, and subjected to control SCR or SO<sub>2</sub> oxidation runs under a feed gas stream including N<sub>2</sub>, NO<sub>x</sub>, NH<sub>3</sub>, O<sub>2</sub>, H<sub>2</sub>O, or SO<sub>2</sub> with variable compositions alongside with the use of a total flow rate of 500 mL min<sup>-1</sup> and a reaction temperature of  $\leq$  400 °C. Effluents emitted from the control volume were monitored using ZKJ-2 (Fuji Electric Co.) for NO/SO<sub>2</sub>, Ultramat 6 (Siemens Co.) for N<sub>2</sub>O, and detector tubes (GASTEC Co.) for NO<sub>2</sub>/NH<sub>3</sub>. NO<sub>x</sub> conversion ( $X_{NO_x}$ ) and N<sub>2</sub> selectivity ( $S_{N_2}$ ) of the catalyst were evaluated using Eqn. S5 and S6, wherein  $C_{YYY, IN}$  and  $C_{YYY, OUT}$  are referred to as concentrations of species YYY at the inlet (IN) and outlet (OUT), respectively.

$$X_{NO_x} (\%) = \frac{C_{NO, IN} - C_{NO, OUT} - C_{NO_2, OUT} - 2 \times C_{N_2O, OUT}}{C_{NO, IN}} \times 100 \quad (S5)$$

$$S_{N_2} (\%) = \frac{C_{NO,IN} + C_{NH_3,IN} - C_{NO,OUT} - C_{NH_3,OUT} - C_{NO_2,OUT} - 2 \times C_{N_2O,OUT}}{C_{NO,IN} + C_{NH_3,IN} - C_{NO,OUT} - C_{NH_3,OUT}} \times 100 \quad (S6)$$

NO<sub>x</sub> consumption rate ( $-r_{NOx}$ ) in a per-NH<sub>3</sub>-accessible site for the catalyst was evaluated using Eqn. S7, in which the quantity of NH<sub>3</sub>-accessible sites in a per-gram of the catalyst ( $N_{NH_3}$ ) can be evaluated via its NH<sub>3</sub>-TPD experiment with NH<sub>3</sub> chemisorption at 150 °C (Table S4).<sup>2-4, 6, 17</sup>  $-r_{NOx}$  generically corresponds to Eqn. S8, in which  $k_{APP}$  and  $C_{NOx}$ ,  $C_{NH_3}$ ,  $C_{O_2}$  indicate the apparent reaction rate constant, NO<sub>x</sub> concentration, NH<sub>3</sub> concentration, and O<sub>2</sub> concentration, respectively, whereas  $\alpha/\beta/\gamma$  denote the reaction orders with respect to NO<sub>x</sub>/NH<sub>3</sub>/O<sub>2</sub>.<sup>3, 4, 6</sup> Arrhenius plot of  $\ln(-r_{NOx})$  versus  $1/T_{REACTION}$  for the catalyst (Eqn. S9) provides a slope ( $-E_{BARRIER}/R$ ) and y-intercept ( $\ln(k_{APP,0} C_{NOx}^\alpha C_{NH_3}^\beta C_{O_2}^\gamma)$ ), by which the energy barrier ( $E_{BARRIER}$ ) and lumped pre-factor ( $k_{APP,0} C_{NOx}^\alpha C_{NH_3}^\beta C_{O_2}^\gamma$ ;  $k'_{APP,0}$ ) required to proceed with SCR are evaluated at reaction temperatures ( $T_{REACTION}$ ) considered, respectively.<sup>3, 4, 6</sup>

$$-r_{NOx} (\text{min}^{-1}) = \frac{\text{moles of NO}_x \text{ reduced per gram of the catalyst per unit time } (\Delta \text{mol}_{NOx} \text{ g}_{CAT}^{-1} \text{ min}^{-1})}{N_{NH_3} (\text{mol}_{NH_3} \text{ g}_{CAT}^{-1})} \quad (S7)$$

$$-r_{NOx} (\text{min}^{-1}) = k_{APP} C_{NOx}^\alpha C_{NH_3}^\beta C_{O_2}^\gamma \quad (S8)$$

$$\ln(-r_{NOx}) = \left(-\frac{E_{BARRIER}}{R}\right) \times \left(\frac{1}{T_{REACTION}}\right) + \ln \left(\frac{k_{APP,0} C_{NOx}^\alpha C_{NH_3}^\beta C_{O_2}^\gamma}{\text{lumped pre-factor}}\right) \quad (S9)$$

AS/ABS degradation rate ( $-r_{AS/ABS}$ ) in a per-NH<sub>3</sub>-accessible site for the catalyst was assessed using Eqn. S10, for which weight lost above NH<sub>3</sub> onset temperature presumably originates from ABS degradation, whereas  $N_{NH_3}$  was contemplated because NH<sub>3</sub>-accessible sites were identified to function as major active species in catalyzing AS/ABS degradation.<sup>4</sup> In addition, TGA-MASS data above SO<sub>2</sub> onset temperature was also considered for the evaluation of  $-r_{AS/ABS}$  for the catalyst, given the rate-determining stage of catalytic AS/ABS degradation pathway we reported elsewhere (*i.e.*, H<sub>2</sub>-assisted dissociative desorption of H<sup>+</sup>••O-SO<sub>2</sub>-O••H<sup>+</sup> from B<sup>-</sup>-H<sup>+</sup>••O-SO<sub>2</sub>-O••H<sup>+</sup>, where B<sup>-</sup> denote conjugate base of Brönsted acidic bond (B-H<sup>+</sup>) in Fig. 1D).<sup>4</sup> In this regard, weight lost at 260 °C, 270 °C, 280 °C, or 290 °C with temperature deviation of  $\pm \sim 0.5$  °C (time interval ( $\Delta t$ ) of  $\leq \sim 0.5$  minutes) was considered to assess  $-r_{AS/ABS}$  of the catalyst (Table S8).<sup>4</sup>  $-r_{AS/ABS}$  can be expressed using a generic n<sup>th</sup>-order reaction rate law, where  $k_{AS/ABS, APP}$  and  $C_{AS/ABS}$  denote apparent reaction rate constant and AS/ABS concentration, respectively.<sup>4</sup> Arrhenius plot of  $\ln(-r_{AS/ABS})$  versus  $1/T_{REACTION}$  for the catalysts (Eqn. S11) provides a slope ( $-E_{BARRIER}/R$ ) and y-intercept ( $\ln(k_{AS/ABS, APP,0} C_{AS/ABS}^n)$ ), in which  $E_{BARRIER}$  and  $k_{AS/ABS, APP,0}$  indicate the energy barrier and lumped pre-factor needed to proceed with AS/ABS degradation at  $T_{REACTION}$  values considered, respectively.<sup>4</sup>

$$-r_{AS/ABS} (\text{min}^{-1}) = \frac{\text{moles of ABS decomposed per gram of the catalyst } (\Delta \text{mol}_{ABS} \text{ g}_{CAT}^{-1})}{N_{NH_3} \text{ of catalyst } (\text{mol}_{NH_3} \text{ g}_{CAT}^{-1}) \times \text{time interval } (\Delta t) \text{ used to measure } \Delta \text{mol}_{ABS} \text{ g}_{CAT}^{-1} (\text{min})} \quad (S10)$$

$$\ln(-r_{AS/ABS}) = \left(-\frac{E_{BARRIER}}{R}\right) \times \left(\frac{1}{T_{REACTION}}\right) + \ln \left(\frac{k_{AS/ABS, APP,0} C_{AS/ABS}^n}{\text{lumped pre-factor}}\right) \quad (S11)$$

**Table S1.** Properties of the catalysts.

|                                                                                                                  | Ni <sub>1</sub> | Ni <sub>2</sub> | Ni <sub>3</sub> | Ni <sub>1</sub> -Sb | Ni <sub>1</sub> -S | Ni <sub>2</sub> -S | Ni <sub>3</sub> -S | Ni <sub>1</sub> -Sb-S |
|------------------------------------------------------------------------------------------------------------------|-----------------|-----------------|-----------------|---------------------|--------------------|--------------------|--------------------|-----------------------|
| V <sup>a</sup> (wt. %)                                                                                           | 2.2 (± 0.1)     | 2.1 (± 0.1)     | 2.2 (± 0.1)     | 2.2 (± 0.1)         | 2.2 (± 0.1)        | 2.1 (± 0.1)        | 2.3 (± 0.1)        | 2.3 (± 0.1)           |
| Ni <sup>a</sup> (wt. %)                                                                                          | 1.3 (± 0.1)     | 2.6 (± 0.1)     | 3.8 (± 0.1)     | 1.2 (± 0.1)         | 1.2 (± 0.1)        | 2.3 (± 0.1)        | 3.6 (± 0.1)        | 1.2 (± 0.1)           |
| S <sup>a</sup> (wt. %)                                                                                           | -               | -               | -               | -                   | 0.7 (± 0.1)        | 0.7 (± 0.1)        | 1.1 (± 0.1)        | 0.6 (± 0.1)           |
| Ni/V (bulk) <sup>a, b</sup>                                                                                      | 0.5 (± 0.1)     | 0.9 (± 0.1)     | 1.5 (± 0.1)     | 0.5 (± 0.1)         | 0.5 (± 0.1)        | 1.0 (± 0.1)        | 1.5 (± 0.1)        | 0.5 (± 0.1)           |
| Ni/V (surface) <sup>b, c</sup>                                                                                   | 0.5 (± 0.1)     | 1.0 (± 0.1)     | 1.5 (± 0.1)     | 0.5 (± 0.1)         | 0.5 (± 0.1)        | 0.9 (± 0.1)        | 1.5 (± 0.1)        | 0.5 (± 0.1)           |
| Ni/V (surface) <sup>b, d</sup>                                                                                   | 0.5 (± 0.1)     | 1.0 (± 0.1)     | 1.4 (± 0.1)     | 0.6 (± 0.1)         | 0.5 (± 0.1)        | 1.1 (± 0.1)        | 1.4 (± 0.1)        | 0.5 (± 0.1)           |
| S/metal (bulk) <sup>a, b, e</sup>                                                                                | -               | -               | -               | -                   | 0.3 (± 0.1)        | 0.3 (± 0.1)        | 0.4 (± 0.1)        | 0.3 (± 0.1)           |
| S/metal (surface) <sup>b, c, e</sup>                                                                             | -               | -               | -               | -                   | 0.4 (± 0.1)        | 0.4 (± 0.1)        | 0.5 (± 0.1)        | 0.4 (± 0.1)           |
| S/metal (surface) <sup>b, d, e</sup>                                                                             | -               | -               | -               | -                   | 0.5 (± 0.1)        | 0.4 (± 0.1)        | 0.4 (± 0.1)        | 0.5 (± 0.1)           |
| S <sub>BET, N<sub>2</sub></sub> <sup>f, g</sup> (mN <sub>2</sub> <sup>2</sup> g <sub>CAT</sub> <sup>-1</sup> )   | 82.8 (± 6.4)    | 79.9 (± 4.2)    | 79.6 (± 3.5)    | 82.0 (± 5.3)        | 64.4 (± 3.4)       | 61.2 (± 5.4)       | 69.2 (± 1.8)       | 59.1 (± 3.4)          |
| V <sub>PORE, N<sub>2</sub></sub> <sup>f, h</sup> (cmN <sub>2</sub> <sup>3</sup> g <sub>CAT</sub> <sup>-1</sup> ) | 0.4 (± 0.1)     | 0.4 (± 0.1)     | 0.4 (± 0.1)     | 0.3 (± 0.1)         | 0.3 (± 0.1)        | 0.3 (± 0.1)        | 0.3 (± 0.1)        | 0.3 (± 0.1)           |
| N <sub>CO</sub> <sup>i</sup> (μmol <sub>CO</sub> g <sub>CAT</sub> <sup>-1</sup> )                                | 1.7 (± 0.1)     | 11.1 (± 0.4)    | 14.6 (± 2.3)    | 2.6 (± 0.1)         | 1.4 (± 0.1)        | 5.4 (± 0.2)        | 8.6 (± 0.1)        | 0.6 (± 0.1)           |
| N <sub>O<sub>2</sub></sub> <sup>j</sup> (μmol <sub>O<sub>2</sub></sub> g <sub>CAT</sub> <sup>-1</sup> )          | 307.4 (± 11.6)  | 410.6 (± 9.5)   | 443.3 (± 4.3)   | 330.3 (± 9.7)       | 260.3 (± 4.1)      | 351.3 (± 8.1)      | 409.8 (± 12.3)     | 280.0 (± 5.3)         |

<sup>a</sup> via XRF. <sup>b</sup> molar ratio. <sup>c</sup> via XPS spectroscopy (Fig. S2). <sup>d</sup> via EDX mapping. <sup>e</sup> metal of Ni+V for Ni<sub>1</sub>-S, Ni<sub>2</sub>-S, Ni<sub>3</sub>-S; Ni+V+Sb for Ni<sub>1</sub>-Sb-S. <sup>f</sup> via N<sub>2</sub> physisorption at -196 °C (Fig. S1). <sup>g</sup> via BET theory. <sup>h</sup> via BJH theory. <sup>i</sup> via CO-pulsed chemisorption at 50 °C (Fig. S9). <sup>j</sup> via O<sub>2</sub>-pulsed chemisorption at 250 °C (Fig. S15).

**Table S2.** Binding energies and relative abundance of surface phases observed in XPS spectra of the catalysts.

|                                               |                        | Ni <sub>1</sub>                         | Ni <sub>2</sub> | Ni <sub>3</sub> | Ni <sub>1</sub> -Sb | Ni <sub>1</sub> -S | Ni <sub>2</sub> -S | Ni <sub>3</sub> -S | Ni <sub>1</sub> -Sb-S |  |
|-----------------------------------------------|------------------------|-----------------------------------------|-----------------|-----------------|---------------------|--------------------|--------------------|--------------------|-----------------------|--|
|                                               |                        | Ni 2p <sub>1/2</sub> <sup>a, b, c</sup> |                 |                 |                     |                    |                    |                    |                       |  |
| Ni <sup>2+</sup> (marked with ●)              | binding energy (eV)    |                                         |                 |                 |                     | 872.0              |                    |                    |                       |  |
|                                               | relative abundance (%) | 73.3                                    | 62.5            | 58.8            | 70.4                | 76.9               | 71.0               | 67.7               | 80.2                  |  |
| Ni <sup>3+</sup> (marked with ●)              | binding energy (eV)    |                                         |                 |                 |                     | 874.6              |                    |                    |                       |  |
|                                               | relative abundance (%) | 26.7                                    | 37.5            | 41.2            | 29.6                | 23.1               | 29.0               | 32.3               | 19.8                  |  |
|                                               |                        | Ni 2p <sub>3/2</sub> <sup>a, b, c</sup> |                 |                 |                     |                    |                    |                    |                       |  |
| Ni <sup>2+</sup> (marked with ○)              | binding energy (eV)    |                                         |                 |                 |                     | 854.3              |                    |                    |                       |  |
|                                               | relative abundance (%) | 73.3                                    | 62.5            | 58.8            | 70.4                | 76.9               | 71.0               | 67.7               | 80.2                  |  |
| Ni <sup>3+</sup> (marked with ○)              | binding energy (eV)    |                                         |                 |                 |                     | 856.7              |                    |                    |                       |  |
|                                               | relative abundance (%) | 26.7                                    | 37.5            | 41.2            | 29.6                | 23.1               | 29.0               | 32.3               | 19.8                  |  |
|                                               |                        | V 2p <sub>3/2</sub> <sup>a, b, d</sup>  |                 |                 |                     |                    |                    |                    |                       |  |
| V <sup>3+</sup> (marked with ○)               | binding energy (eV)    |                                         |                 |                 |                     | 515.2-515.3        |                    |                    |                       |  |
|                                               | relative abundance (%) | 13.9                                    | 15.6            | 5.3             | 7.6                 | 6.9                | 3.5                | 11.7               | 7.5                   |  |
| V <sup>4+</sup> (marked with ○)               | binding energy (eV)    |                                         |                 |                 |                     | 516.2-516.3        |                    |                    |                       |  |
|                                               | relative abundance (%) | 20.0                                    | 30.2            | 44.3            | 25.1                | 23.6               | 32.1               | 27.8               | 18.3                  |  |
| V <sup>5+</sup> (marked with ○)               | binding energy (eV)    |                                         |                 |                 |                     | 517.0-517.1        |                    |                    |                       |  |
|                                               | relative abundance (%) | 66.1                                    | 54.2            | 50.4            | 67.3                | 69.5               | 64.4               | 60.5               | 74.2                  |  |
|                                               |                        | O 1s <sup>a, b, e</sup>                 |                 |                 |                     |                    |                    |                    |                       |  |
| O <sub>β</sub> (marked with ○)                | binding energy (eV)    |                                         |                 |                 |                     | 529.9              |                    |                    |                       |  |
|                                               | relative abundance (%) | 63.8                                    | 61.9            | 57.5            | 50.2                | 64.4               | 63.4               | 63.1               | 61.4                  |  |
| O <sub>α</sub> (marked with ○)                | binding energy (eV)    |                                         |                 |                 |                     | 530.6              |                    |                    |                       |  |
|                                               | relative abundance (%) | 35.1                                    | 35.6            | 36.4            | 41.9                | 31.9               | 31.1               | 28.1               | 34.8                  |  |
| O' <sub>α</sub> (marked with ○)               | binding energy (eV)    |                                         |                 |                 |                     | 532.0              |                    |                    |                       |  |
|                                               | relative abundance (%) | 1.1                                     | 2.5             | 6.1             | 7.9                 | 3.7                | 5.5                | 8.8                | 3.8                   |  |
|                                               |                        | S 2p <sub>1/2</sub> <sup>a, b, f</sup>  |                 |                 |                     |                    |                    |                    |                       |  |
| SO <sub>3</sub> <sup>2-</sup> (marked with ●) | binding energy (eV)    |                                         |                 |                 |                     | 167.3              |                    |                    |                       |  |
|                                               | concentration (%)      | -                                       | -               | -               | -                   | 11.8               | 10.3               | 7.4                | 10.3                  |  |
| HSO <sub>3</sub> <sup>-</sup> (marked with ●) | binding energy (eV)    |                                         |                 |                 |                     | 168.3              |                    |                    |                       |  |
|                                               | concentration (%)      | -                                       | -               | -               | -                   | 25.0               | 21.8               | 22.0               | 18.7                  |  |
| SO <sub>4</sub> <sup>2-</sup> (marked with ●) | binding energy (eV)    |                                         |                 |                 |                     | 169.5              |                    |                    |                       |  |
|                                               | concentration (%)      | -                                       | -               | -               | -                   | 33.8               | 32.0               | 29.4               | 37.4                  |  |
| HSO <sub>4</sub> <sup>-</sup> (marked with ●) | binding energy (eV)    |                                         |                 |                 |                     | 170.4              |                    |                    |                       |  |
|                                               | concentration (%)      | -                                       | -               | -               | -                   | 29.4               | 35.9               | 41.2               | 33.6                  |  |
|                                               |                        | S 2p <sub>3/2</sub> <sup>a, b, f</sup>  |                 |                 |                     |                    |                    |                    |                       |  |
| SO <sub>3</sub> <sup>2-</sup> (marked with ○) | binding energy (eV)    |                                         |                 |                 |                     | 166.1              |                    |                    |                       |  |
|                                               | concentration (%)      | -                                       | -               | -               | -                   | 11.8               | 10.3               | 7.4                | 10.3                  |  |

|                                               |                     |   |   |   |   |       |      |      |      |      |
|-----------------------------------------------|---------------------|---|---|---|---|-------|------|------|------|------|
| HSO <sub>3</sub> <sup>-</sup> (marked with ○) | binding energy (eV) |   |   |   |   | 167.1 |      |      |      |      |
|                                               | concentration (%)   | - | - | - | - |       | 25.0 | 21.8 | 22.0 | 18.7 |
| SO <sub>4</sub> <sup>2-</sup> (marked with ○) | binding energy (eV) |   |   |   |   | 168.3 |      |      |      |      |
|                                               | concentration (%)   | - | - | - | - |       | 33.8 | 32.0 | 29.4 | 37.4 |
| HSO <sub>4</sub> <sup>-</sup> (marked with ○) | binding energy (eV) |   |   |   |   | 169.2 |      |      |      |      |
|                                               | concentration (%)   | - | - | - | - |       | 29.4 | 35.9 | 41.2 | 33.6 |

<sup>a</sup> fitted via Gaussian function. <sup>b</sup> peak resolution of 0.05 eV. <sup>c</sup> See Fig. S8. <sup>d</sup> See Fig. S7. <sup>e</sup> See Fig. S14. <sup>f</sup> peak separation of ~1.2 eV. (See Fig. 3.)



**Table S3.** Ramping rates ( $\beta$ ), desorption temperatures ( $T_{MAX}$ ) with maximum  $NH_3$  signal intensities, and slopes of  $\ln(\beta/T_{MAX}^2)$  versus  $1/T_{MAX}$  for the sub-bands obtained via curve-fits of  $NH_3$ -TPD profiles for the catalysts.

| sub-band <sup>a</sup>                           | $\beta$ ( $^{\circ}C\ min^{-1}$ ) | $T_{MAX}$ ( $^{\circ}C$ ) |                    |                       |                       |
|-------------------------------------------------|-----------------------------------|---------------------------|--------------------|-----------------------|-----------------------|
|                                                 |                                   | Ni <sub>1</sub> -S        | Ni <sub>2</sub> -S | Ni <sub>3</sub> -S    | Ni <sub>1</sub> -Sb-S |
| I (marked with $\circ$ )                        | 10                                | 227.0                     | 227.4              | 227.4                 | 227.2                 |
|                                                 | 20                                | 228.7                     | 229.6              | 230.1                 | 229.5                 |
|                                                 | 30                                | 230.8                     | 231.6              | 231.9                 | 231.4                 |
| II (marked with $\circ$ )                       | 10                                | 273.2                     | 273.2              | 275.0                 | 273.1                 |
|                                                 | 20                                | 274.7                     | 275.8              | 277.8                 | 275.4                 |
|                                                 | 30                                | 277.5                     | 278.0              | 280.0                 | 278.2                 |
| III (marked with $\circ$ )                      | 10                                | 350.4                     | 337.0              | 342.4                 | 336.8                 |
|                                                 | 20                                | 353.6                     | 340.5              | 346.0                 | 340.2                 |
|                                                 | 30                                | 356.0                     | 342.7              | 348.7                 | 342.6                 |
| sub-band                                        | slope <sup>b, c</sup>             |                           |                    |                       |                       |
|                                                 | Ni <sub>1</sub> -S                | Ni <sub>2</sub> -S        | Ni <sub>3</sub> -S | Ni <sub>1</sub> -Sb-S |                       |
| I (marked with $\circ\circ\circ$ )              | -3503.5                           | -3098.0                   | -2780.9            | -2531.1               |                       |
| II (marked with $\triangle\triangle\triangle$ ) | -3520.3                           | -3171.2                   | -3017.8            | -2570.3               |                       |
| III (marked with $\nabla\nabla\nabla$ )         | -3498.4                           | -3194.2                   | -2881.2            | -2697.3               |                       |

<sup>a</sup> via Gaussian function. (See Fig. S11.) <sup>b</sup> via TPD theorem. <sup>c</sup> regression factors of  $\geq 0.96$ . (See Fig. 4B.)

**Table S4.** NO<sub>x</sub> consumption rates ( $-r_{\text{NO}_x}$ ) of the catalysts

| temperature (°C) | $-r_{\text{NO}_x}^{a, b}$ ( $\times 10^{-1} \text{ min}^{-1}$ ) |                    |                    |                       |
|------------------|-----------------------------------------------------------------|--------------------|--------------------|-----------------------|
|                  | Ni <sub>1</sub> -S                                              | Ni <sub>2</sub> -S | Ni <sub>3</sub> -S | Ni <sub>1</sub> -Sb-S |
| 220              | 1.38 (± 0.09)                                                   | 0.43 (± 0.01)      | 0.35 (± 0.02)      | 1.51 (± 0.01)         |
| 235              | 1.98 (± 0.03)                                                   | 0.63 (± 0.01)      | 0.53 (± 0.01)      | 2.13 (± 0.07)         |
| 243              | 2.23 (± 0.06)                                                   | 0.75 (± 0.04)      | 0.63 (± 0.02)      | 2.47 (± 0.04)         |
| 250              | 2.53 (± 0.06)                                                   | 0.85 (± 0.01)      | 0.71 (± 0.03)      | 2.78 (± 0.07)         |

<sup>a</sup> SCR conditions: 800 ppm NO<sub>x</sub>; 800 ppm NH<sub>3</sub>; 3 vol. % O<sub>2</sub>; 5.4 vol. % H<sub>2</sub>O; catalysts with the sizes with 300-425 μm; space velocity of 300,000 hr<sup>-1</sup>; total flow rate of 500 mL min<sup>-1</sup>; balanced by a N<sub>2</sub>. <sup>b</sup> X<sub>NO<sub>x</sub></sub> values of < 25 %.

**Table S5.** Ramping rates ( $\beta$ ), desorption temperatures ( $T_{MAX}$ ) with maximum TCD signal intensities, and slopes of  $\ln(\beta/T_{MAX}^2)$  versus  $1/T_{MAX}$  for the sub-bands obtained via curve-fits of O<sub>2</sub>-TPD profiles for the catalysts.

| sub-band <sup>a</sup> | $\beta$ (°C min <sup>-1</sup> ) | $T_{MAX}$ (°C)     |                    |                       |                       |
|-----------------------|---------------------------------|--------------------|--------------------|-----------------------|-----------------------|
|                       |                                 | Ni <sub>1</sub> -S | Ni <sub>2</sub> -S | Ni <sub>3</sub> -S    | Ni <sub>1</sub> -Sb-S |
| I (marked with ○)     | 10                              | 421.3              | 421.4              | 395.0                 | 380.3                 |
|                       | 20                              | 425.0              | 425.0              | 398.2                 | 384.0                 |
|                       | 30                              | 429.0              | 428.6              | 401.3                 | 388.4                 |
| II (marked with ○)    | 10                              | 445.6              | 452.2              | 458.1                 | 406.0                 |
|                       | 20                              | 450.0              | 456.0              | 462.0                 | 410.0                 |
|                       | 30                              | 454.0              | 459.8              | 465.4                 | 414.5                 |
| sub-band              | slope <sup>b, c</sup>           |                    |                    |                       |                       |
|                       | Ni <sub>1</sub> -S              | Ni <sub>2</sub> -S | Ni <sub>3</sub> -S | Ni <sub>1</sub> -Sb-S |                       |
| I (marked with ○○○)   | -2923.0                         | -3224.0            | -3539.3            | -2317.9               |                       |
| II (marked with △△△)  | -2798.0                         | -3316.2            | -3572.7            | -2378.5               |                       |

<sup>a</sup> via Gaussian function. (See Fig. S16.) <sup>b</sup> via TPD theorem. <sup>c</sup> regression factors of  $\geq 0.99$ . (See Fig. 7B.)

**Table S6.** N<sub>2</sub> selectivities (S<sub>N2</sub>) of the catalysts exposed to wet feed gases with the occasional inclusion of SO<sub>2</sub>.

| S <sub>N2</sub> (%)                                    |                                 |                                 |                                 |                                    |                                       |                                                                |                                                                   |
|--------------------------------------------------------|---------------------------------|---------------------------------|---------------------------------|------------------------------------|---------------------------------------|----------------------------------------------------------------|-------------------------------------------------------------------|
| with H <sub>2</sub> O only <sup>a</sup>                |                                 |                                 |                                 |                                    |                                       |                                                                |                                                                   |
| T <sub>REACTION</sub> (°C)                             | Ni <sub>1</sub> -S <sup>b</sup> | Ni <sub>2</sub> -S <sup>b</sup> | Ni <sub>3</sub> -S <sup>b</sup> | Ni <sub>1</sub> -Sb-S <sup>b</sup> | Ni <sub>1</sub> -Sb-S-HT <sup>b</sup> | V <sub>2</sub> O <sub>5</sub> -WO <sub>3</sub> -S <sup>b</sup> | V <sub>2</sub> O <sub>5</sub> -WO <sub>3</sub> -S-HT <sup>b</sup> |
| 450                                                    | 99.8                            | 99.8                            | 96.8                            | 99.4                               | -                                     | -                                                              | -                                                                 |
| 500                                                    | 99.4                            | 99.3                            | 96.8                            | 97.6                               | -                                     | -                                                              | -                                                                 |
| with H <sub>2</sub> O and SO <sub>2</sub> <sup>a</sup> |                                 |                                 |                                 |                                    |                                       |                                                                |                                                                   |
| T <sub>REACTION</sub> (°C)                             | Ni <sub>1</sub> -S <sup>b</sup> | Ni <sub>2</sub> -S <sup>b</sup> | Ni <sub>3</sub> -S <sup>b</sup> | Ni <sub>1</sub> -Sb-S <sup>b</sup> | Ni <sub>1</sub> -Sb-S-HT <sup>b</sup> | V <sub>2</sub> O <sub>5</sub> -WO <sub>3</sub> -S <sup>b</sup> | V <sub>2</sub> O <sub>5</sub> -WO <sub>3</sub> -S-HT <sup>b</sup> |
| 450                                                    | 100.0                           | -                               | -                               | 99.5                               | 97.1                                  | 98.5                                                           | 94.9                                                              |
| 500                                                    | 99.7                            | -                               | -                               | 98.2                               | 91.1                                  | 93.6                                                           | 83.0                                                              |

<sup>a</sup> SCR conditions: 800 ppm NO<sub>x</sub>; 800 ppm NH<sub>3</sub>; SO<sub>2</sub> of 0 ppm for 'with H<sub>2</sub>O only (Fig. 7D)' or 500 ppm for 'with H<sub>2</sub>O and SO<sub>2</sub>' (Fig. 9B); 3 vol. % O<sub>2</sub>; 5.4 vol. % H<sub>2</sub>O; catalysts with the sizes with 300-425 μm; space velocity of 60,000 hr<sup>-1</sup>; total flow rate of 500 mL min<sup>-1</sup>; balanced by a N<sub>2</sub>. <sup>b</sup> S<sub>N2</sub> of 100 % at 150-400 °C.

**Table S7.** Coefficients used to fit H<sub>2</sub>O isotherms of the catalysts via Toth equation.

| catalyst              | temperature (°C)   | coefficient <sup>a</sup>                                                                          |                         |                         | regression factor (R <sup>2</sup> ) <sup>b</sup> |
|-----------------------|--------------------|---------------------------------------------------------------------------------------------------|-------------------------|-------------------------|--------------------------------------------------|
|                       |                    | N <sub>H<sub>2</sub>O,0</sub><br>(mmol <sub>H<sub>2</sub>O</sub> g <sub>CAT</sub> <sup>-1</sup> ) | C (bar <sup>-1</sup> )  | D (dimensionless)       |                                                  |
| Ni <sub>1</sub> -S    | 10 (marked with ○) | 8009524.85                                                                                        | 0.19 X 10 <sup>0</sup>  | 0.51 X 10 <sup>-1</sup> | 0.99                                             |
|                       | 25 (marked with ○) | 44287.97                                                                                          | 0.20 X 10 <sup>-2</sup> | 0.96 X 10 <sup>-1</sup> | 0.99                                             |
|                       | 40 (marked with ○) | 3201.05                                                                                           | 0.72 X 10 <sup>-3</sup> | 0.18 X 10 <sup>0</sup>  | 0.99                                             |
| Ni <sub>1</sub> -Sb-S | 10 (marked with ○) | 32247.13                                                                                          | 0.46 X 10 <sup>-4</sup> | 0.18 X 10 <sup>0</sup>  | 0.99                                             |
|                       | 25 (marked with ○) | 6906.09                                                                                           | 0.68 X 10 <sup>-4</sup> | 0.26 X 10 <sup>0</sup>  | 0.99                                             |
|                       | 40 (marked with ○) | 10.59                                                                                             | 0.20 X 10 <sup>0</sup>  | 4.55 X 10 <sup>0</sup>  | 0.99                                             |

<sup>a</sup> via Toth equation. (See Fig. S18.) <sup>b</sup> using Polymath 6.0.

**Table S8.** TGA-MASS dataset used to assess  $-r_{AS/ABS}$  values of the catalysts poisoned with AS/ABS.

| catalyst poisoned<br>with AS/ABS <sup>a</sup> | temperature (°C) | $\Delta T$ <sup>b</sup> (°C) | $\Delta t$ (minute) | $\Delta AS/ABS$ <sup>c, d, e</sup><br>( $\mu\text{mol}_{ABS}$ ) | $-r_{AS/ABS}$<br>( $\times 10^{-2} \text{ min}^{-1}$ ) |
|-----------------------------------------------|------------------|------------------------------|---------------------|-----------------------------------------------------------------|--------------------------------------------------------|
| $V_2O_5-WO_3-S$                               | 260              | 0.53                         | 0.27                | 2.10                                                            | 3.1                                                    |
|                                               | 270              | 0.48                         | 0.24                | 2.10                                                            | 3.5                                                    |
|                                               | 280              | 0.40                         | 0.20                | 2.10                                                            | 4.2                                                    |
|                                               | 290              | 0.35                         | 0.17                | 2.10                                                            | 4.8                                                    |
| $Ni_1-Sb-S$                                   | 260              | 0.38                         | 0.19                | 2.02                                                            | 5.3                                                    |
|                                               | 270              | 0.16                         | 0.08                | 1.01                                                            | 6.0                                                    |
|                                               | 280              | 0.29                         | 0.14                | 2.02                                                            | 6.9                                                    |
|                                               | 290              | 0.13                         | 0.07                | 1.01                                                            | 7.5                                                    |

<sup>a</sup> AS/ABS poison conditions: 800 ppm  $NO_x$ ; 800 ppm  $NH_3$ ; 500 ppm  $SO_2$ ; 3 vol. %  $O_2$ ; 5.4 vol. %  $H_2O$ ; 180 °C; 30 hours; catalysts with the sizes with 300-425  $\mu\text{m}$ ; space velocity of 60,000  $\text{hr}^{-1}$ ; total flow rate of 500  $\text{mL min}^{-1}$ ; balanced by a  $N_2$ . <sup>b</sup> deviation of  $\pm 0.5$  °C from 260 °C, 270 °C, 280 °C, or 290 °C. <sup>c</sup> under an Ar; total flow rate of 50  $\text{mL min}^{-1}$ ; ramping rate of 2 °C  $\text{min}^{-1}$ . <sup>d</sup> assuming that the transition of AS to ABS is complete at < 260 °C. (ABS is assumed to be the sole reactant.) <sup>e</sup> See Fig. S19.

**Table S9.** AS/ABS tolerance of SO<sub>2</sub><sup>2-</sup>-functionalized metal vanadates deposited on Sb/TiO<sub>2</sub>.

| metal vanadate <sup>a, b</sup>                | time-on-stream SCR conditions <sup>c</sup> |                                    |                                                              | reference    |
|-----------------------------------------------|--------------------------------------------|------------------------------------|--------------------------------------------------------------|--------------|
|                                               | temperature (°C)                           | space velocity (hr <sup>-1</sup> ) | time span to show X <sub>NOx</sub> /X <sub>NOx, 0</sub> ~0.8 |              |
| Mn <sub>1</sub> V <sub>2</sub> O <sub>6</sub> | 220                                        | 30,000                             | ~17 hours                                                    | <sup>2</sup> |
| Cu <sub>3</sub> V <sub>2</sub> O <sub>8</sub> | 220                                        | 30,000                             | ~16 hours                                                    | <sup>3</sup> |
| Ni <sub>1</sub> V <sub>2</sub> O <sub>6</sub> | 220                                        | 30,000                             | ~53 hours                                                    | this work    |

<sup>a</sup> SO<sub>2</sub><sup>2-</sup> functionalization conditions: 500 ppm SO<sub>2</sub>; 3 vol. % O<sub>2</sub>; catalysts with the sizes with 300-425 μm; space velocity of 60,000 hr<sup>-1</sup>; total flow rate of 500 ml min<sup>-1</sup>; ramping rate of 10 °C min<sup>-1</sup>; 500 °C for an hour; balanced by a N<sub>2</sub>. <sup>b</sup> supported on Sb/TiO<sub>2</sub> with Sb contents of 3 wt. %. <sup>c</sup> reaction condition: 800 ppm NO<sub>x</sub>; 800 ppm NH<sub>3</sub>; 500 ppm SO<sub>2</sub>; 3 vol. % O<sub>2</sub>; 5.4 vol. % H<sub>2</sub>O (for Mn<sub>1</sub>V<sub>2</sub>O<sub>6</sub>) or 6 vol. % H<sub>2</sub>O (for Cu<sub>3</sub>V<sub>2</sub>O<sub>8</sub>); catalysts with the sizes with 300-425 μm; total flow rate of 500 ml min<sup>-1</sup>, balanced by a N<sub>2</sub>.

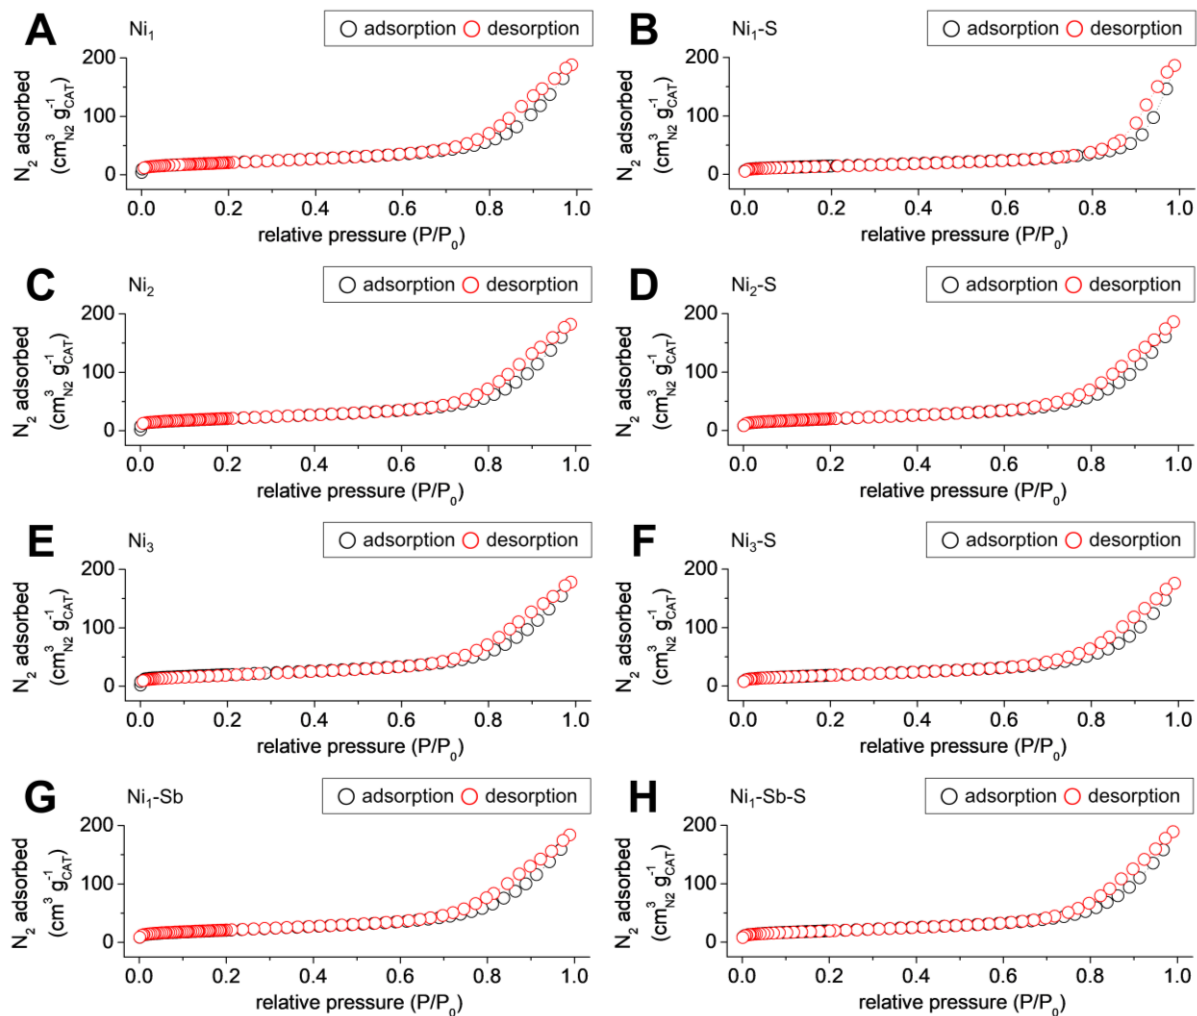

**Fig. S1.**  $N_2$  isotherms of the catalysts ( $Ni_1$  for A;  $Ni_2$  for C;  $Ni_3$  for E;  $Ni_1-Sb$  for G) and those functionalized with  $SO_4^{2-}/HSO_4^-$  ( $Ni_1-S$  for B;  $Ni_2-S$  for D;  $Ni_3-S$  for F;  $Ni_1-Sb-S$  for H).



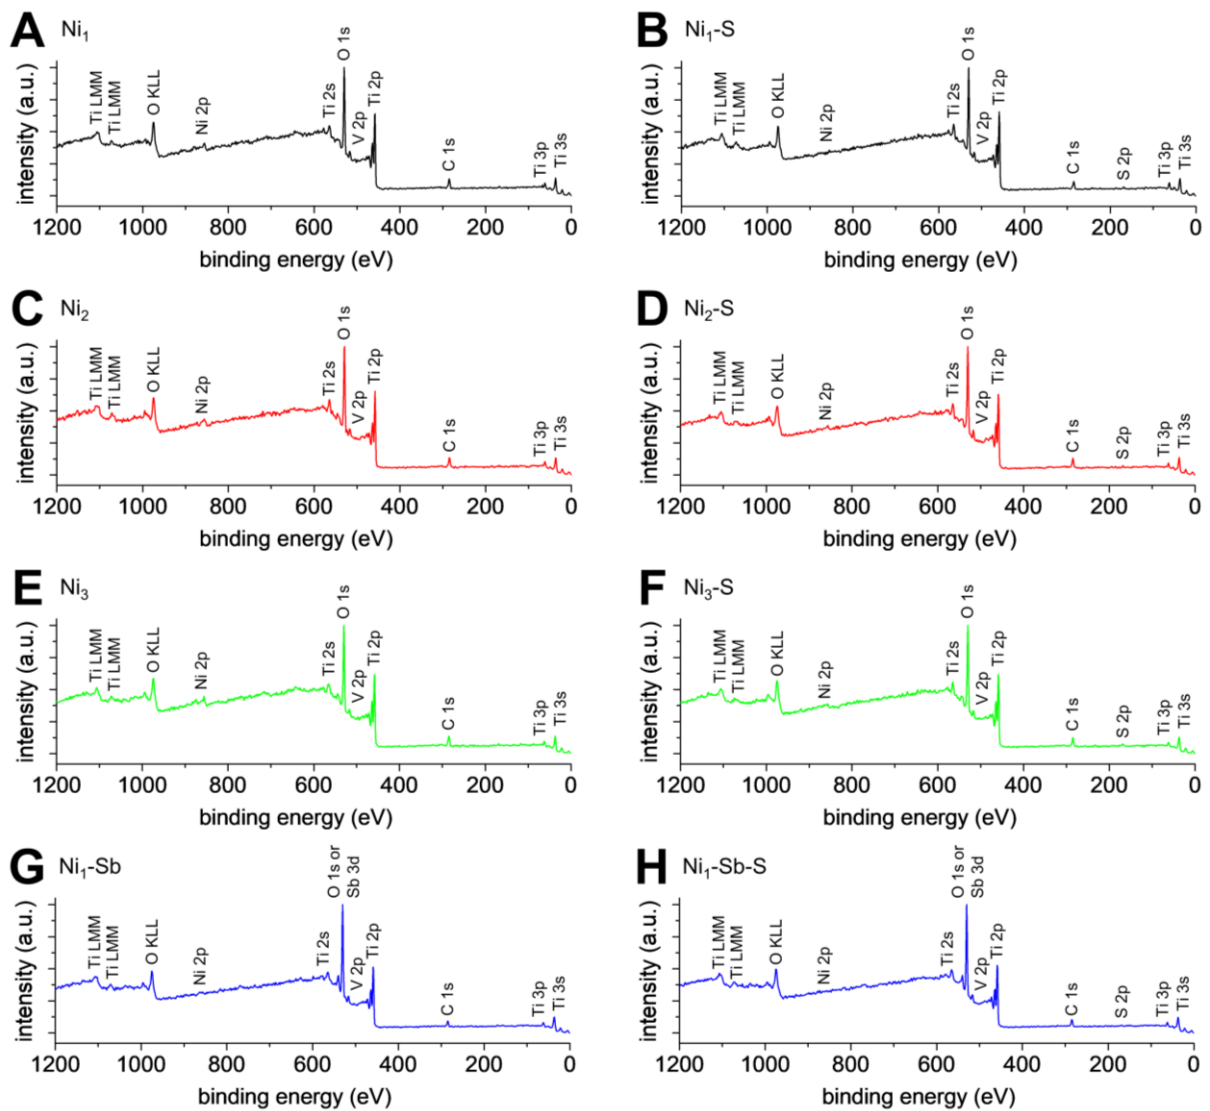

**Fig. S2.** Full scan survey of the XPS spectra for the catalysts ( $\text{Ni}_1$  for A;  $\text{Ni}_2$  for C;  $\text{Ni}_3$  for E;  $\text{Ni}_1\text{-Sb}$  for G) and those functionalized with  $\text{SO}_4^{2-}/\text{HSO}_4^-$  ( $\text{Ni}_1\text{-S}$  for B;  $\text{Ni}_2\text{-S}$  for D;  $\text{Ni}_3\text{-S}$  for F;  $\text{Ni}_1\text{-Sb-S}$  for H). In (G-H), albeit with substantial overlaps between Sb 3d  $_{5/2}$  and O 1s regimes at binding energies of 525.0-535.0 eV,<sup>3,4,6</sup> surface O compositions were in marked excess relative to their surface Sb counterparts. This thus made it highly sound that the XPS spectra of  $\text{Ni}_1\text{-Sb}$  and  $\text{Ni}_1\text{-Sb-S}$  at binding energies of 525.0-535.0 eV could be dictated by O of chemisorbed  $\text{H}_2\text{O}$ , labile O, and lattice O species.<sup>4</sup>

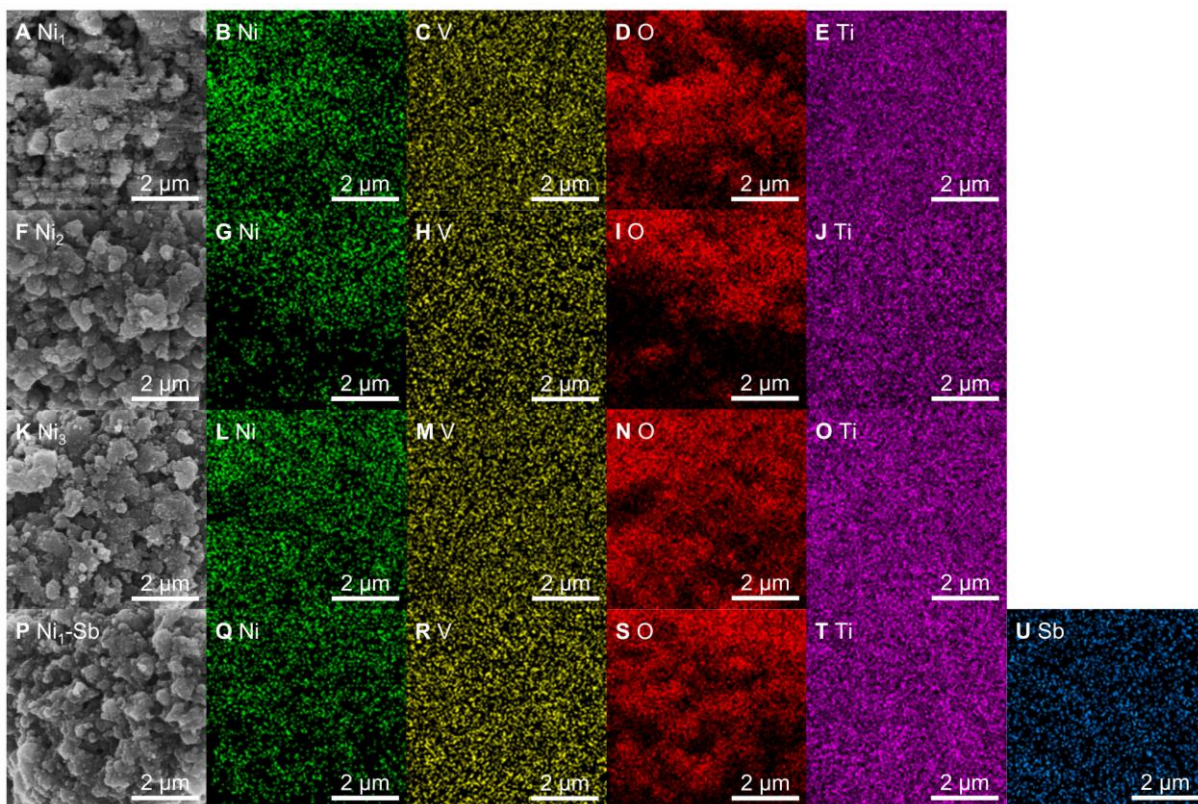

**Fig. S3.** EDX mapping images of the catalysts (Ni<sub>1</sub> for A-E; Ni<sub>2</sub> for F-J; Ni<sub>3</sub> for K-O; Ni<sub>1</sub>-Sb for P-U).

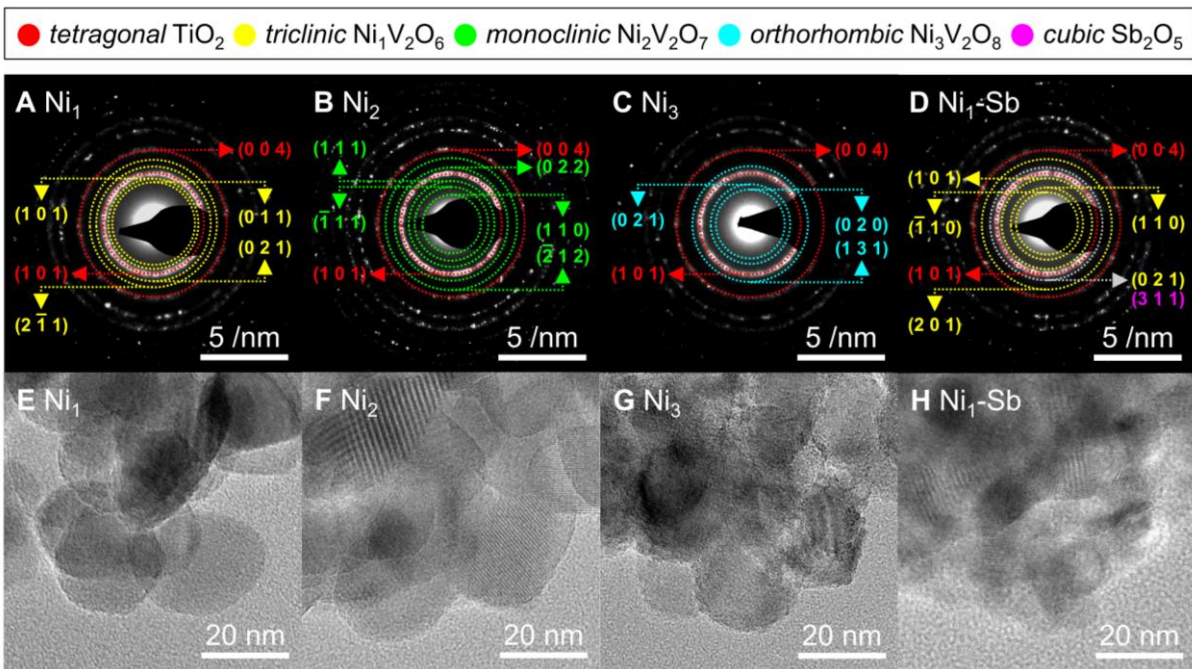

**Fig. S4.** SAED patterns (A-D) and HRTEM images (E-H) of the catalysts ( $\text{Ni}_1$  for A and E;  $\text{Ni}_2$  for B and F;  $\text{Ni}_3$  for C and G;  $\text{Ni}_1\text{-Sb}$  for D and H). In (A-D), dashed circles indicate surface diffractions indexed to those of *tetragonal*  $\text{TiO}_2$  (anatase, JCPDF No. of 01-071-1166), *triclinc*  $\text{Ni}_1\text{V}_2\text{O}_6$  (JCPDF No. of 01-076-0359), *monoclinic*  $\text{Ni}_2\text{V}_2\text{O}_7$  (JCPDF No. of 00-038-0285), *orthorhombic*  $\text{Ni}_3\text{V}_2\text{O}_8$  (JCPDF No. of 01-070-2392), or *cubic*  $\text{Sb}_2\text{O}_5$  (JCPDF No. of 00-011-0690). Surface diffractions with  $d$  spacing values of  $< 2.37 \text{ \AA}$  were not assigned due to significant overlaps among the diffractions of  $\text{TiO}_2$ ,  $\text{Ni}_1\text{V}_2\text{O}_6$ ,  $\text{Ni}_2\text{V}_2\text{O}_7$ ,  $\text{Ni}_3\text{V}_2\text{O}_8$ , or  $\text{Sb}_2\text{O}_5$ .

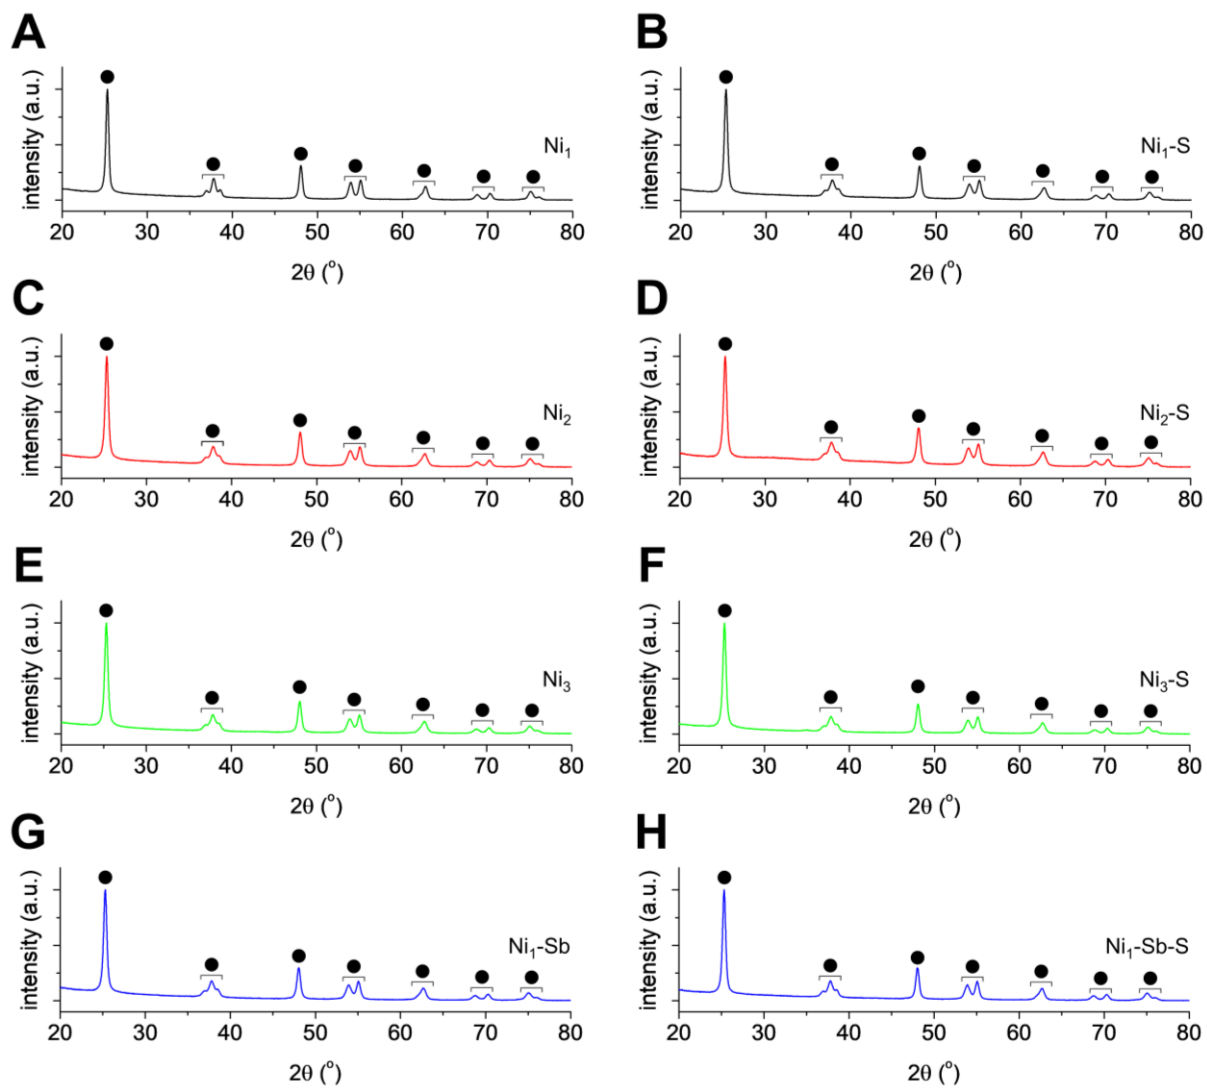

**Fig. S5.** XRD patterns of the catalysts ( $\text{Ni}_1$  for A;  $\text{Ni}_2$  for C;  $\text{Ni}_3$  for E;  $\text{Ni}_1\text{-Sb}$  for G) and those functionalized with  $\text{SO}_4^{2-}/\text{HSO}_4^-$  ( $\text{Ni}_1\text{-S}$  for B;  $\text{Ni}_2\text{-S}$  for D;  $\text{Ni}_3\text{-S}$  for F;  $\text{Ni}_1\text{-Sb-S}$  for H). In (A-H), black solid circles denote bulk diffractions assigned to those of *tetragonal*  $\text{TiO}_2$  (anatase, JCPDF No. of 01-071-1166).



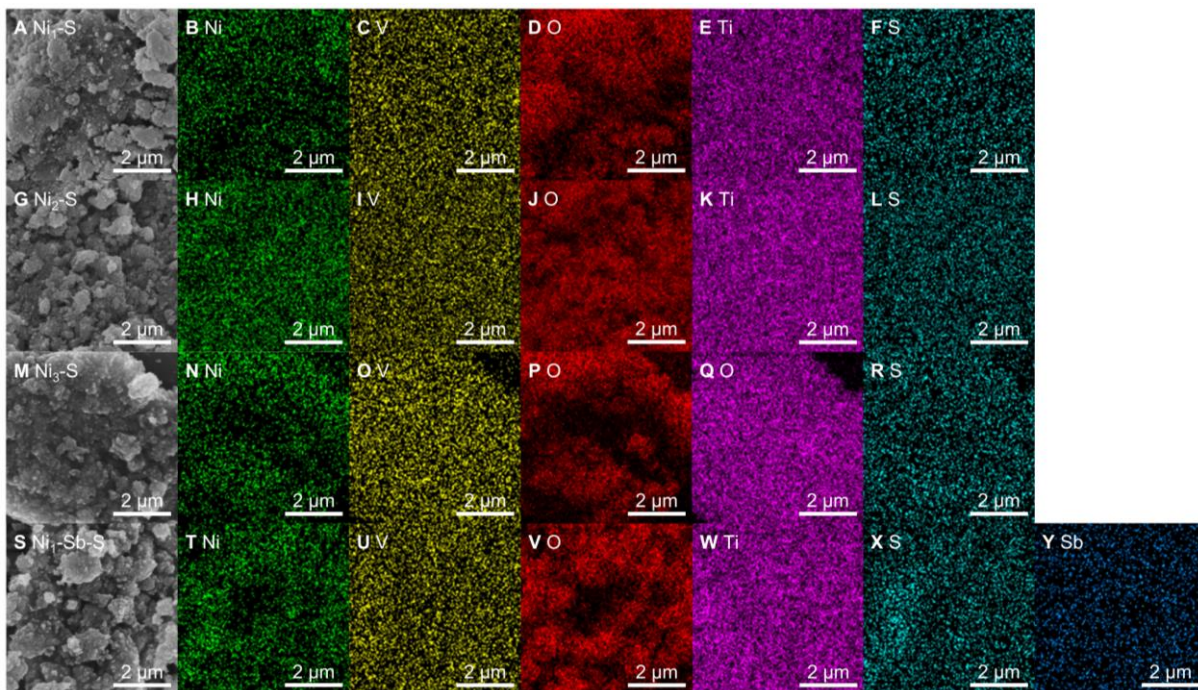

**Fig. S6.** EDX mapping images of the catalysts ( $\text{Ni}_1\text{-S}$  for A-F;  $\text{Ni}_2\text{-S}$  for G-L;  $\text{Ni}_3\text{-S}$  for M-R;  $\text{Ni}_1\text{-Sb-S}$  for S-Y).

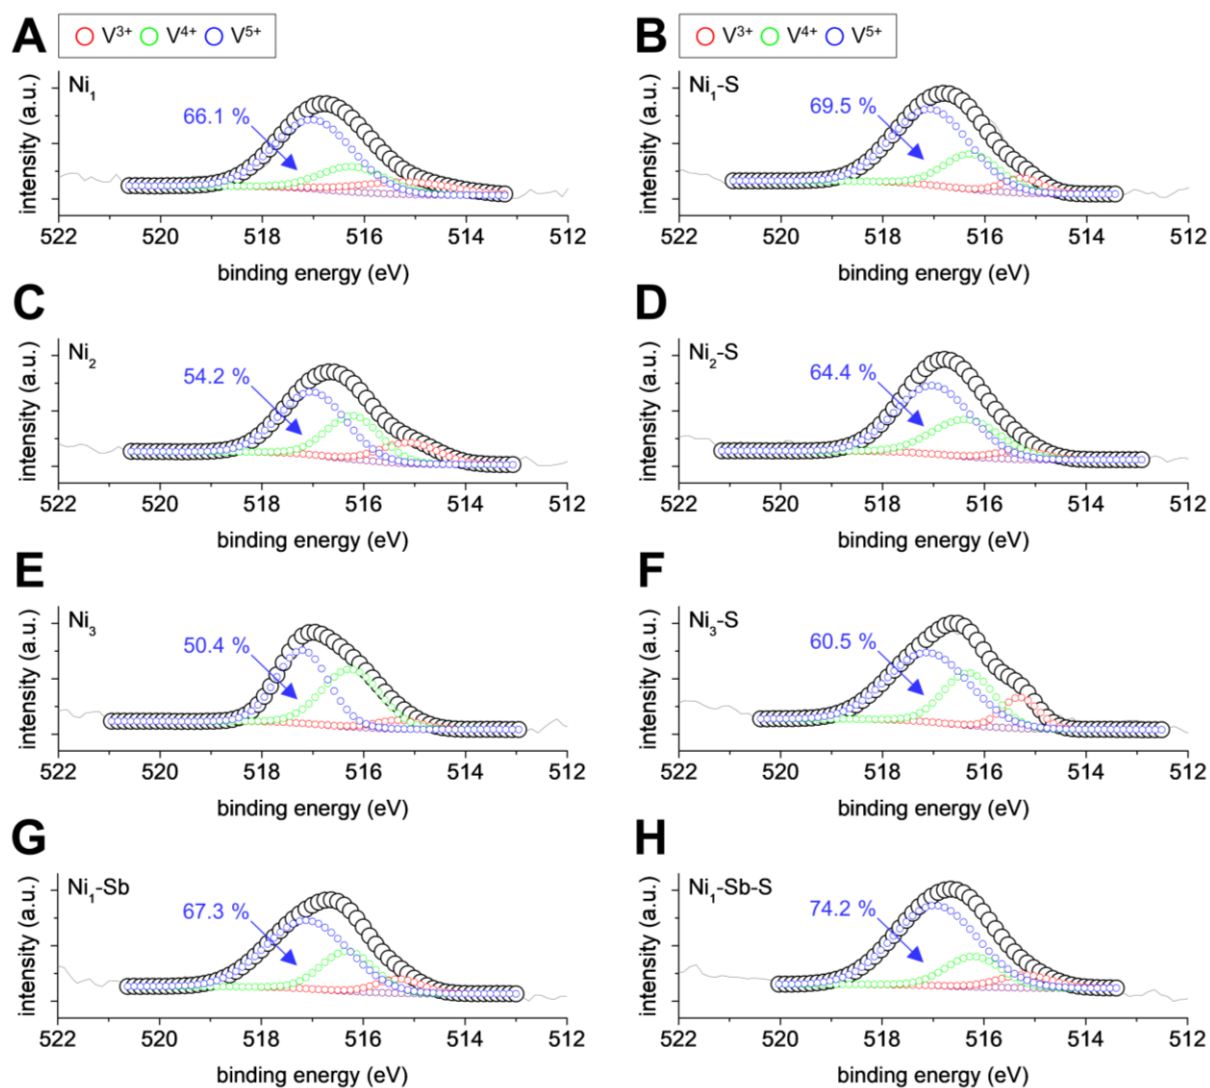

**Fig. S7.** XPS spectra of the catalysts ( $\text{Ni}_1$  for A;  $\text{Ni}_2$  for C;  $\text{Ni}_3$  for E;  $\text{Ni}_1\text{-Sb}$  for G) and those functionalized with  $\text{SO}_2^{2-}/\text{HSO}_2^-$  ( $\text{Ni}_1\text{-S}$  for B;  $\text{Ni}_2\text{-S}$  for D;  $\text{Ni}_3\text{-S}$  for F;  $\text{Ni}_1\text{-Sb-S}$  for H) in the V 2p domains. In (A-H), gray solid lines and black empty circles denote raw and fitted spectra, respectively, whereas purple empty circles indicate backgrounds. In addition, red, green, and blue empty circles denote surface  $\text{V}^{3+}$ ,  $\text{V}^{4+}$ , and  $\text{V}^{5+}$  phases, respectively.

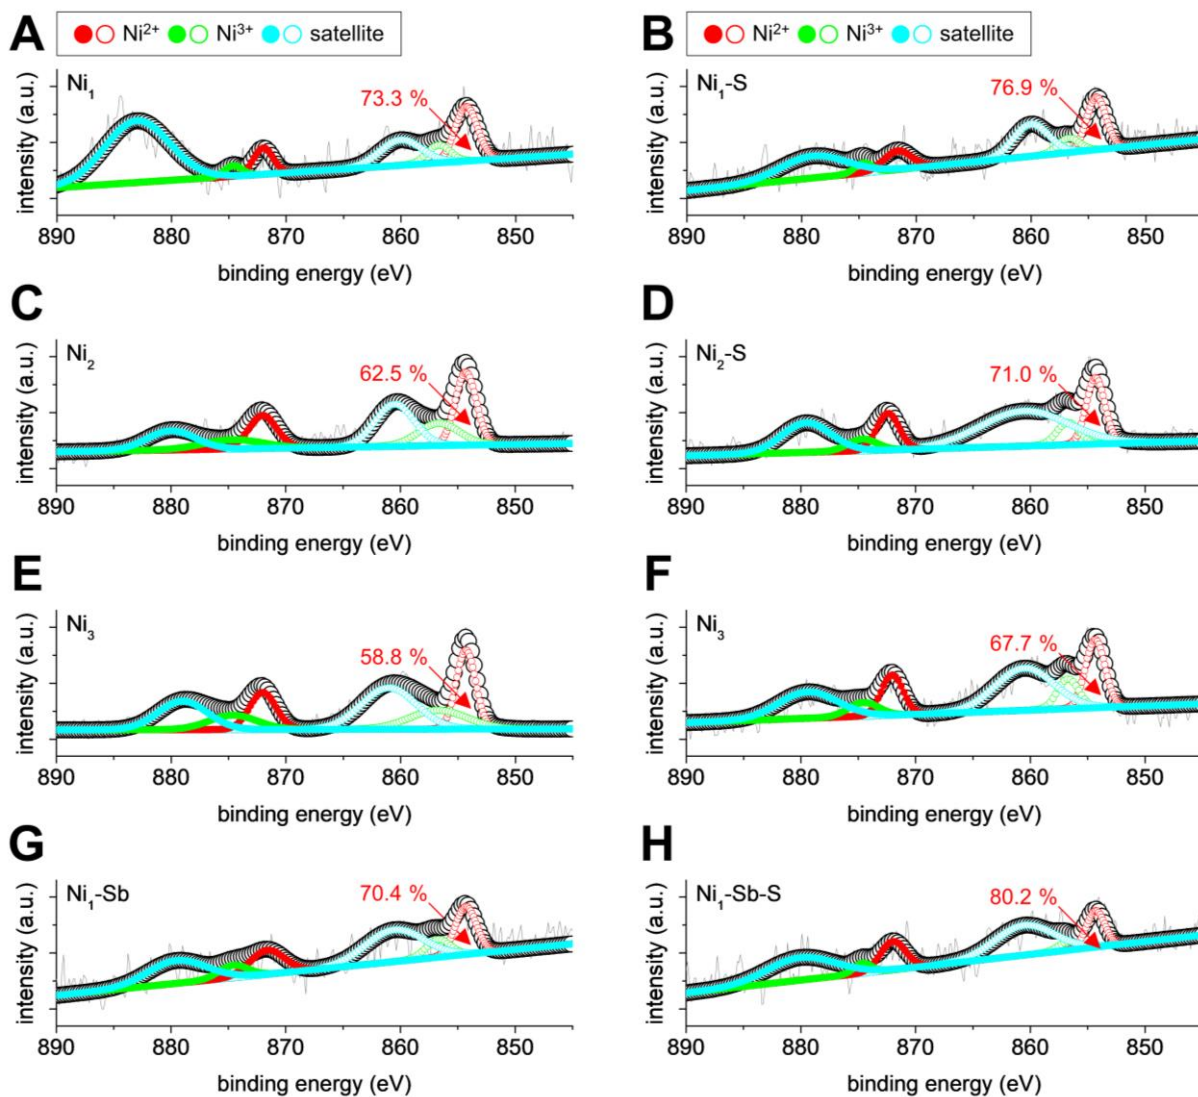

**Fig. S8.** XPS spectra of the catalysts (Ni<sub>1</sub> for A; Ni<sub>2</sub> for C; Ni<sub>3</sub> for E; Ni<sub>1</sub>-Sb for G) and those functionalized with SO<sub>2</sub><sup>2-</sup>/HSO<sub>3</sub><sup>-</sup> (Ni<sub>1</sub>-S for B; Ni<sub>2</sub>-S for D; Ni<sub>3</sub>-S for F; Ni<sub>1</sub>-Sb-S for H) in the Ni 2p domains. In (A-H), gray solid lines and black empty circles denote raw and fitted spectra, respectively, whereas purple empty circles indicate backgrounds. In addition, red/green/cyan solid and empty circles denote surface Ni<sup>2+</sup>/Ni<sup>3+</sup>/satellite in the Ni 2p<sub>1/2</sub> and Ni 2p<sub>3/2</sub> regimes, respectively.

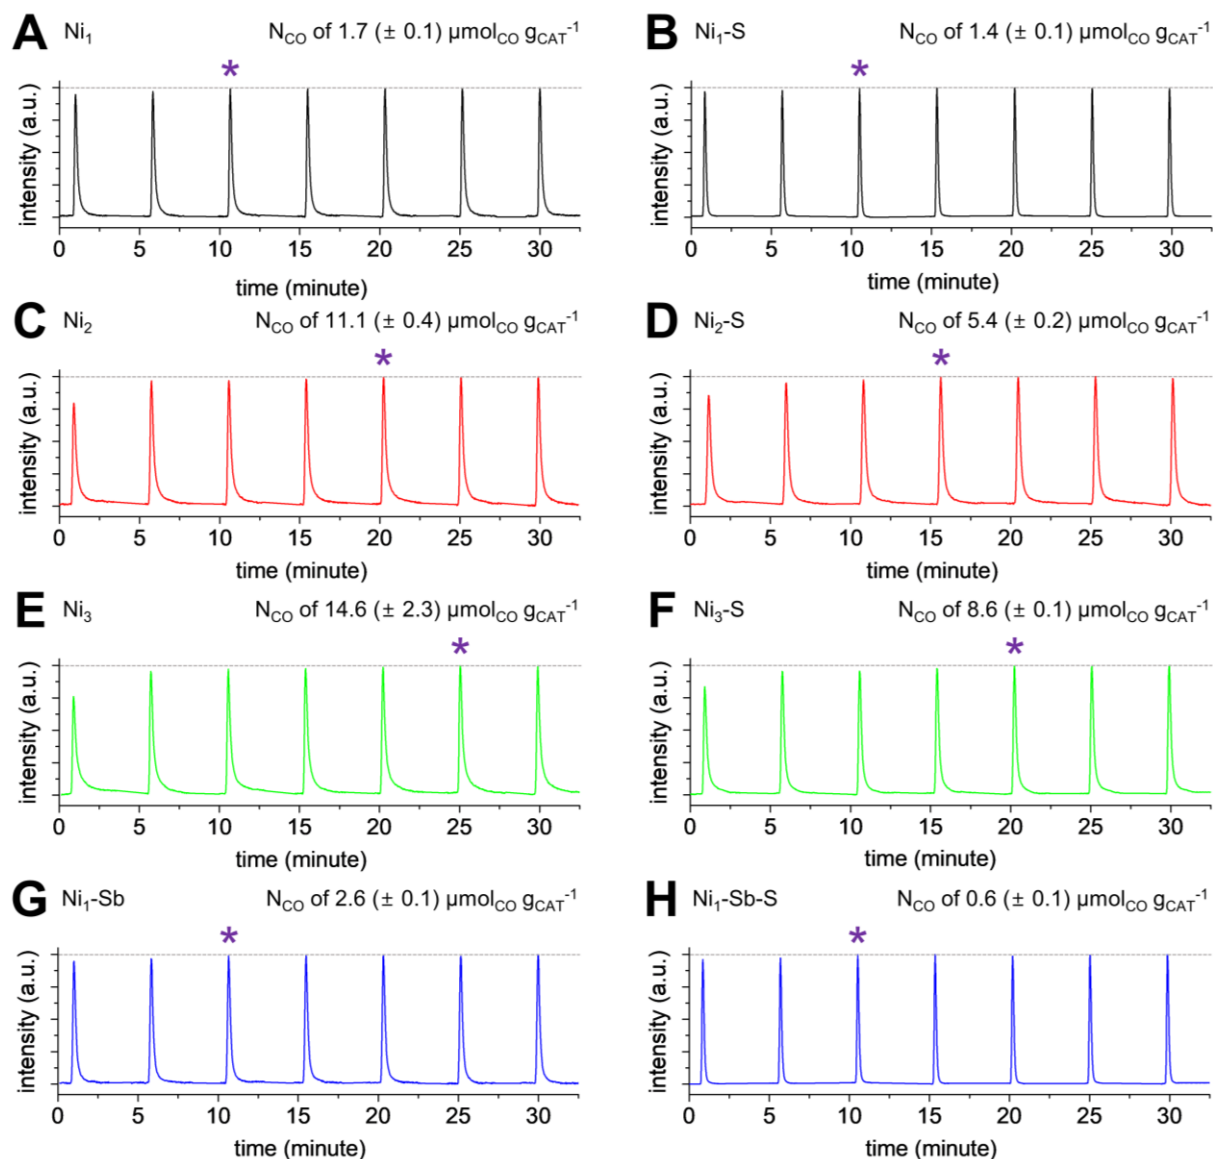

**Fig. S9.** CO-pulsed chemisorption profiles of the catalysts (Ni<sub>1</sub> for A; Ni<sub>2</sub> for C; Ni<sub>3</sub> for E; Ni<sub>1</sub>-Sb for G) and those functionalized with SO<sub>4</sub><sup>2-</sup>/HSO<sub>4</sub><sup>-</sup> (Ni<sub>1</sub>-S for B; Ni<sub>2</sub>-S for D; Ni<sub>3</sub>-S for F; Ni<sub>1</sub>-Sb-S for H) at 50 °C. In (A-G), \* corresponds to the onset of TCD signals for CO, whose intensities were almost invariant.



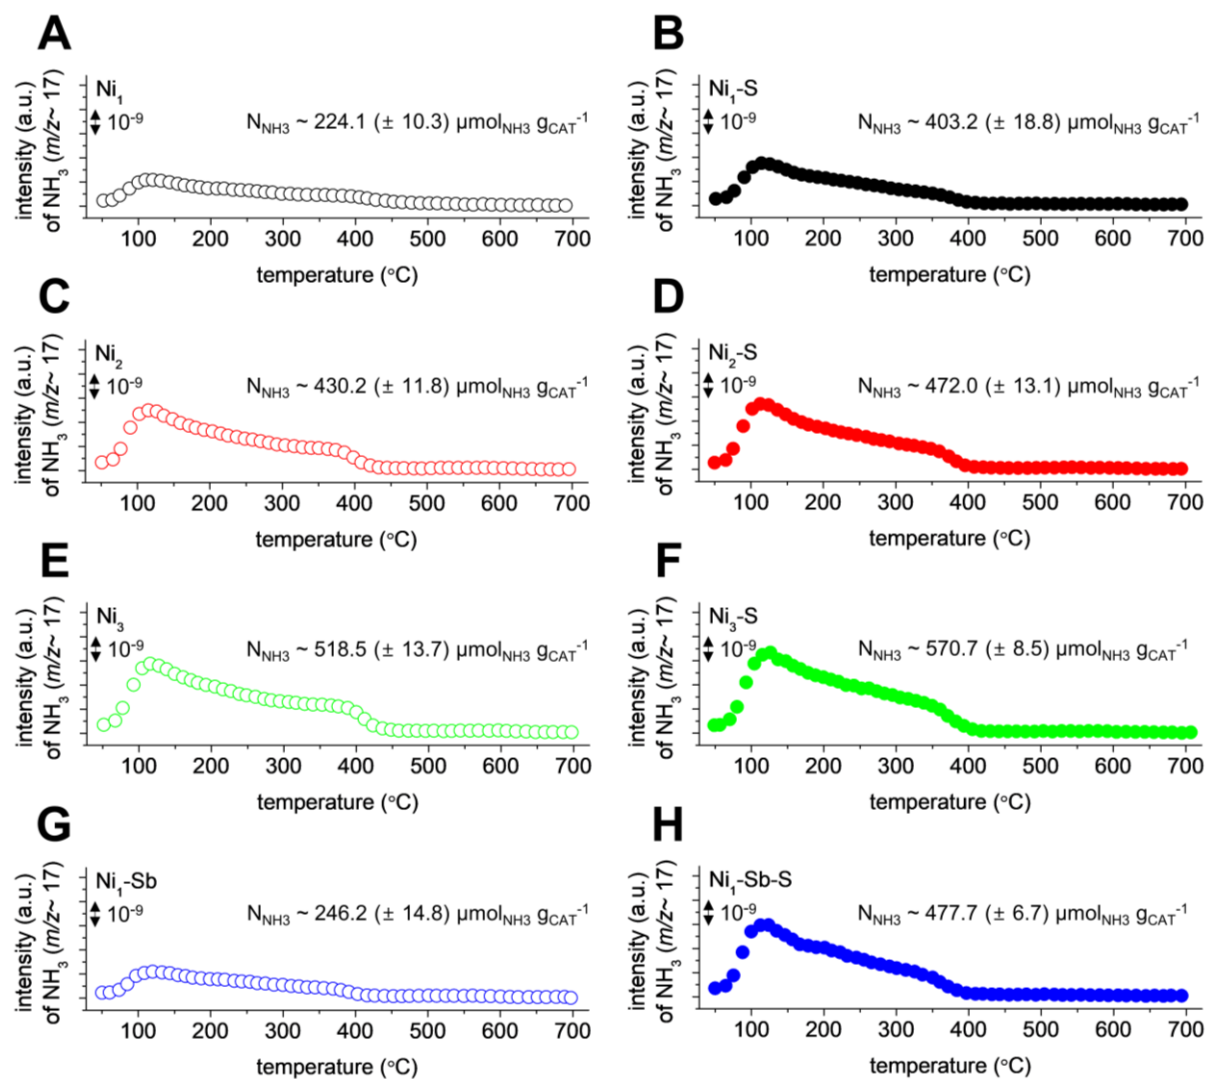

**Fig. S10.**  $\text{NH}_3$ -TPD profiles ( $\text{NH}_3$  signal versus temperature) of the catalysts ( $\text{Ni}_1$  for A;  $\text{Ni}_2$  for C;  $\text{Ni}_3$  for E;  $\text{Ni}_1\text{-Sb}$  for G) and those functionalized with  $\text{SO}_4^{2-}/\text{HSO}_4^-$  ( $\text{Ni}_1\text{-S}$  for B;  $\text{Ni}_2\text{-S}$  for D;  $\text{Ni}_3\text{-S}$  for F;  $\text{Ni}_1\text{-Sb-S}$  for H). The catalyst surfaces chemisorbed  $\text{NH}_3$  at 50 °C and were then heated to 700 °C with a ramping rate of 10 °C  $\text{min}^{-1}$ . In (A-H),  $N_{\text{NH}_3}$  values indicate the numbers of  $\text{NH}_3$  adsorbed in a per-gram of the catalysts at 50 °C.

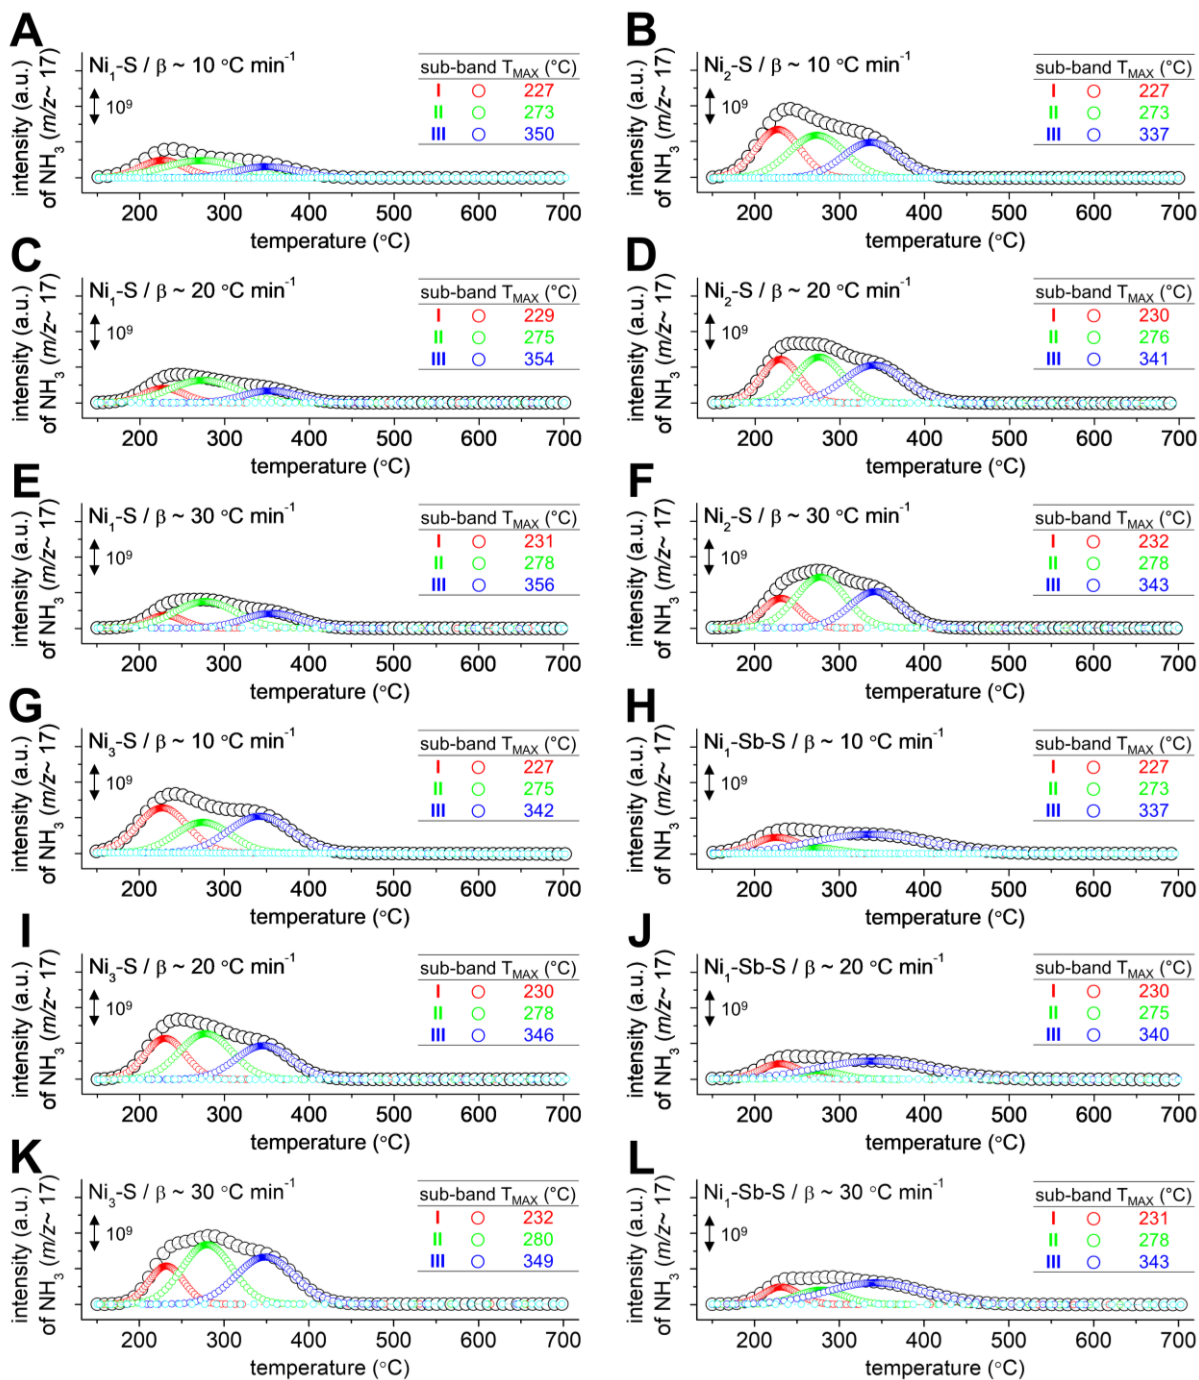

**Fig. S11.**  $\text{NH}_3$ -TPD profiles ( $\text{NH}_3$  signal versus temperature) of the catalysts functionalized with  $\text{SO}_z^{2-}/\text{HSO}_z^-$  ( $\text{Ni}_1$ -S for A, C, and E;  $\text{Ni}_2$ -S for B, D, and F;  $\text{Ni}_3$ -S for G, I, and K;  $\text{Ni}_1$ -Sb-S for H, J, and L). The catalyst surfaces chemisorbed  $\text{NH}_3$  at 150 °C and were then heated to 700 °C with a ramping rate ( $\beta$ ) of 10 °C  $\text{min}^{-1}$  (A, B, G, and H), 20 °C  $\text{min}^{-1}$  (C, D, I, and J), or 30 °C  $\text{min}^{-1}$  (E, F, K, and L). In (A-L),  $\text{NH}_3$ -TPD profiles were de-convoluted using Gaussian function to reveal backgrounds (cyan empty circles) and three sub-bands (I (red empty circle), II (green empty circle), and III (blue empty circle)), whose temperatures with maximum  $\text{NH}_3$  signal intensities ( $T_{\text{MAX}}$ ) are presented in inset tables and served to assess  $\text{NH}_3$  binding energies ( $E_{\text{NH}_3}$ ) of the catalyst surfaces at 150 °C.

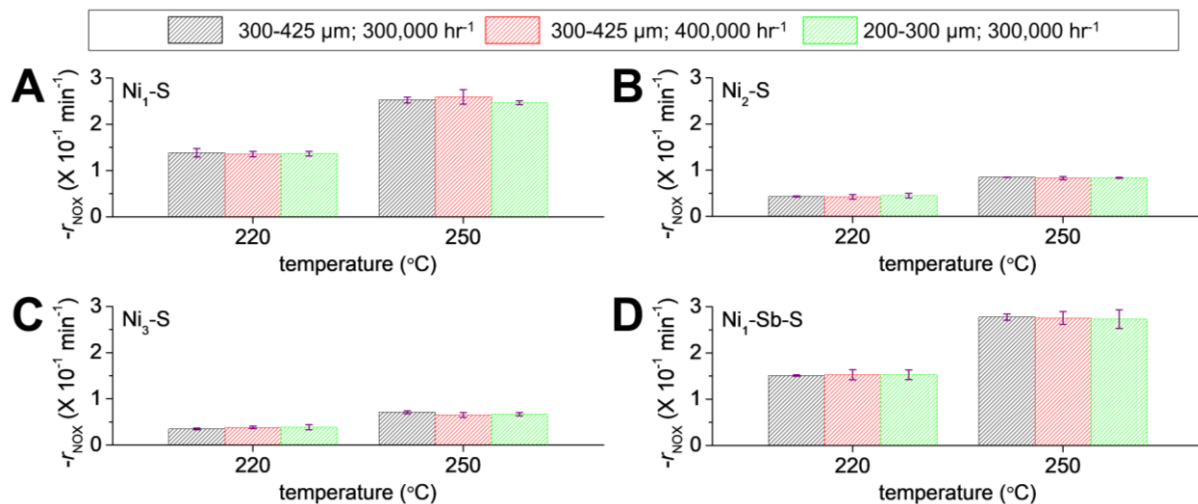

**Fig. S12.**  $\text{NO}_x$  consumption rates ( $-r_{\text{NO}_x}$ ) of the catalysts upon the change in their particle sizes (200-300  $\mu\text{m}$  or 300-425  $\mu\text{m}$ ) or space velocities (300,000  $\text{hr}^{-1}$  or 400,000  $\text{hr}^{-1}$ ) at 220 and 250  $^{\circ}\text{C}$  ( $\text{Ni}_1\text{-S}$  for A;  $\text{Ni}_2\text{-S}$  for B;  $\text{Ni}_3\text{-S}$  for C;  $\text{Ni}_1\text{-Sb-S}$  for D). SCR conditions: 800 ppm  $\text{NO}_x$ ; 800 ppm  $\text{NH}_3$ ; 3 vol. %  $\text{O}_2$ ; 5.4 vol. %  $\text{H}_2\text{O}$ ; total flow rate of 500  $\text{mL min}^{-1}$ ; balanced by a  $\text{N}_2$ .

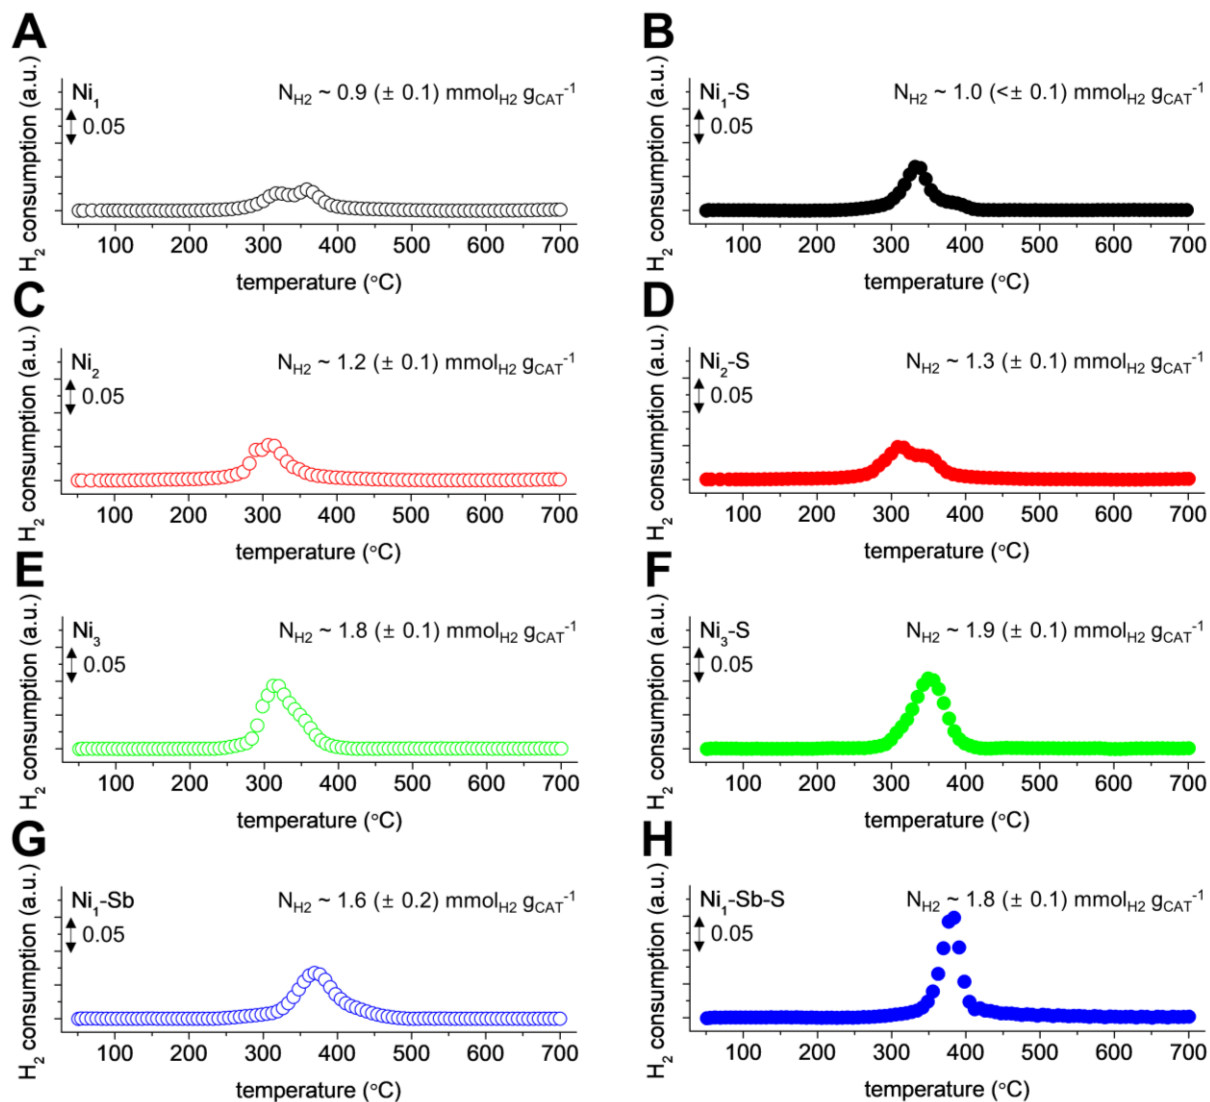

**Fig. S13.** H<sub>2</sub>-TPR profiles (TCD signal versus temperature) of the catalysts (Ni<sub>1</sub> for A; Ni<sub>2</sub> for C; Ni<sub>3</sub> for E; Ni<sub>1</sub>-Sb for G) and those functionalized with SO<sub>3</sub><sup>2-</sup>/HSO<sub>3</sub><sup>-</sup> (Ni<sub>1</sub>-S for B; Ni<sub>2</sub>-S for D; Ni<sub>3</sub>-S for F; Ni<sub>1</sub>-Sb-S for H). The catalyst surfaces were reduced with H<sub>2</sub> at 50-700 °C with a ramping rate of 10 °C min<sup>-1</sup>. In (A-H), N<sub>H2</sub> values indicate the numbers of H<sub>2</sub> needed to reduce a gram of the catalysts.

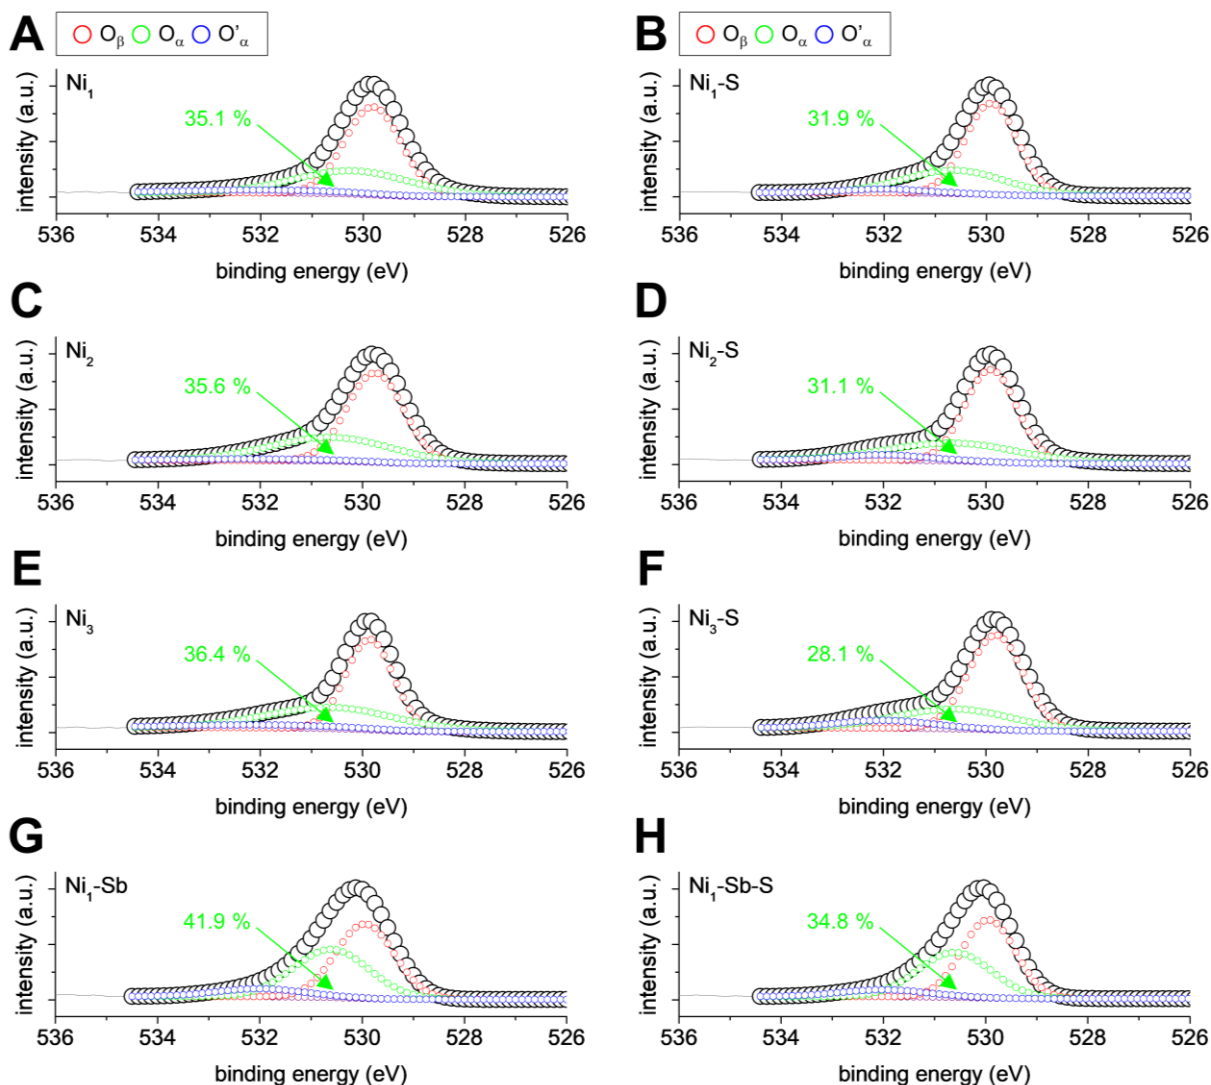

**Fig. S14.** XPS spectra of the catalysts ( $\text{Ni}_1$  for A;  $\text{Ni}_2$  for C;  $\text{Ni}_3$  for E;  $\text{Ni}_1\text{-Sb}$  for G) and those functionalized with  $\text{SO}_4^{2-}/\text{HSO}_4^-$  ( $\text{Ni}_1\text{-S}$  for B;  $\text{Ni}_2\text{-S}$  for D;  $\text{Ni}_3\text{-S}$  for F;  $\text{Ni}_1\text{-Sb-S}$  for H) in the O 1s domains. In (A-F), gray solid lines and black empty circles denote raw and fitted spectra, respectively, whereas purple empty circles indicate backgrounds. In addition, red, green, and blue empty circles denote surface  $\text{O}_\beta$ ,  $\text{O}_\alpha$ , and  $\text{O}'_\alpha$  phases, respectively.

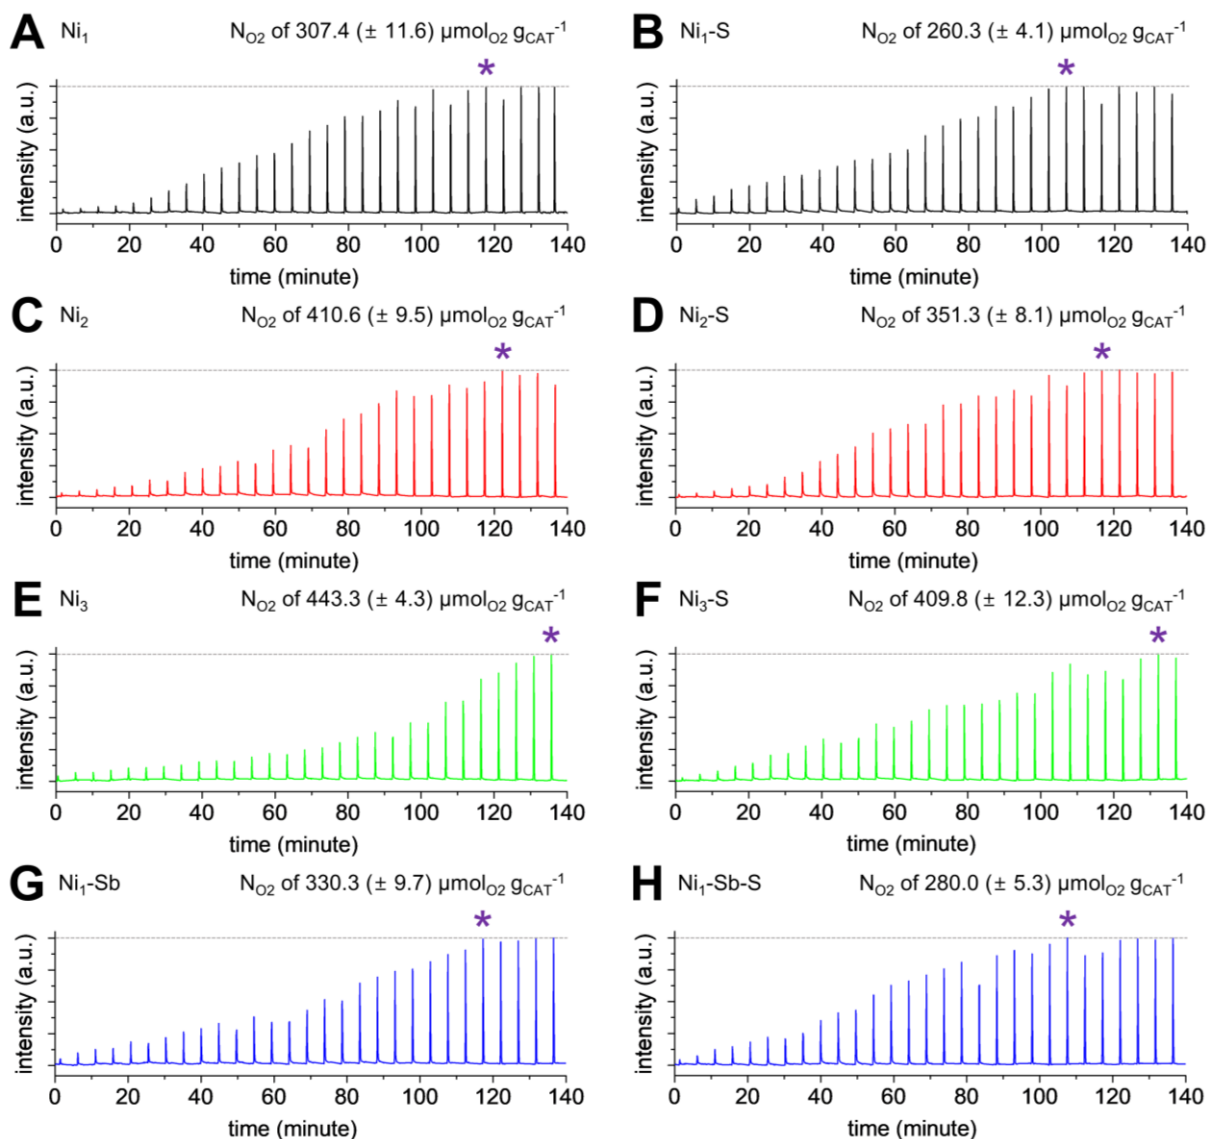

**Fig. S15.** O<sub>2</sub>-pulsed chemisorption profiles of the catalysts (Ni<sub>1</sub> for A; Ni<sub>2</sub> for C; Ni<sub>3</sub> for E; Ni<sub>1</sub>-Sb for G) and those functionalized with SO<sub>4</sub><sup>2-</sup>/HSO<sub>4</sub><sup>-</sup> (Ni<sub>1</sub>-S for B; Ni<sub>2</sub>-S for D; Ni<sub>3</sub>-S for F; Ni<sub>1</sub>-Sb-S for H) at 250 °C. In (A-G), \* corresponds to the onset of TCD signals for O<sub>2</sub>, whose intensities were almost invariant.



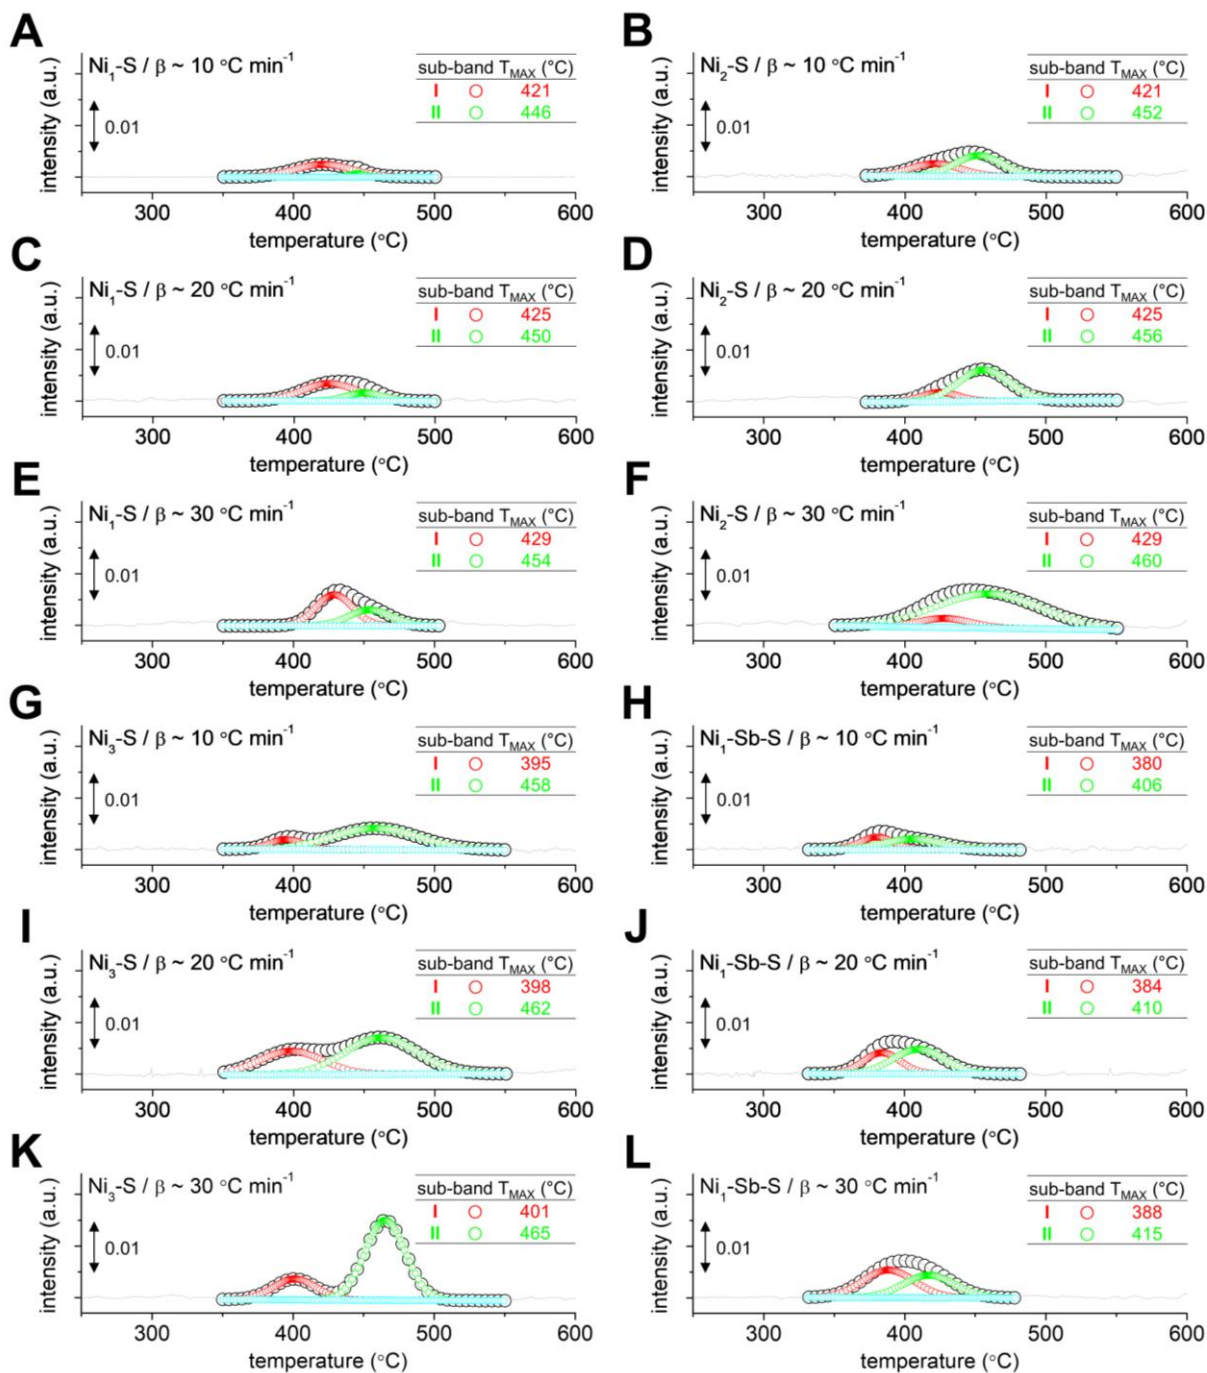

**Fig. S16.** O<sub>2</sub>-TPD profiles (TCD signal versus temperature) of the catalysts functionalized with SO<sub>4</sub><sup>2-</sup>/HSO<sub>4</sub><sup>-</sup> (Ni<sub>1</sub>-S for A, C, and E; Ni<sub>2</sub>-S for B, D, and F; Ni<sub>3</sub>-S for G, I, and K; Ni<sub>1</sub>-Sb-S for H, J, and L). The catalyst surfaces were reduced with H<sub>2</sub> at 300 °C for an hour, cooled to 250 °C, chemisorbed O<sub>2</sub> at 250 °C, and were then heated to 600 °C with a ramping rate ( $\beta$ ) of 10 °C min<sup>-1</sup> (A, B, G, and H), 20 °C min<sup>-1</sup> (C, D, I, and J), or 30 °C min<sup>-1</sup> (E, F, K, and L). In (A-L), O<sub>2</sub>-TPD profiles were de-convoluted using Gaussian function to reveal backgrounds (cyan empty circles) and two sub-bands (I (red empty circle) and II (green empty circle)), whose temperatures with maximum TCD signal intensities ( $T_{MAX}$ ) are presented in inset tables and served to assess O<sub>2</sub> binding energies ( $E_{OL/OM}$ ) of the catalyst surfaces at 250 °C.

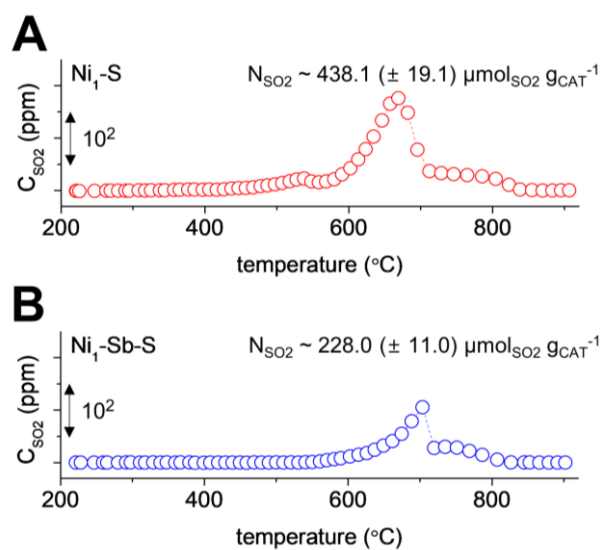

**Fig. S17.**  $\text{SO}_2$ -TPD profiles ( $\text{SO}_2$  concentration ( $C_{\text{SO}_2}$ ) versus temperature) of the catalysts functionalized with  $\text{SO}_4^{2-}/\text{HSO}_4^-$  ( $\text{Ni}_1\text{-S}$  for A;  $\text{Ni}_1\text{-Sb-S}$  for B). The catalyst surfaces chemisorbed  $\text{SO}_2$  at  $220\text{ }^{\circ}\text{C}$  and were then heated to  $900\text{ }^{\circ}\text{C}$  with a ramping rate of  $10\text{ }^{\circ}\text{C min}^{-1}$ . In (A-C),  $N_{\text{SO}_2}$  values indicate the numbers of  $\text{SO}_2$  adsorbed in a per-gram of the catalysts at  $220\text{ }^{\circ}\text{C}$ .



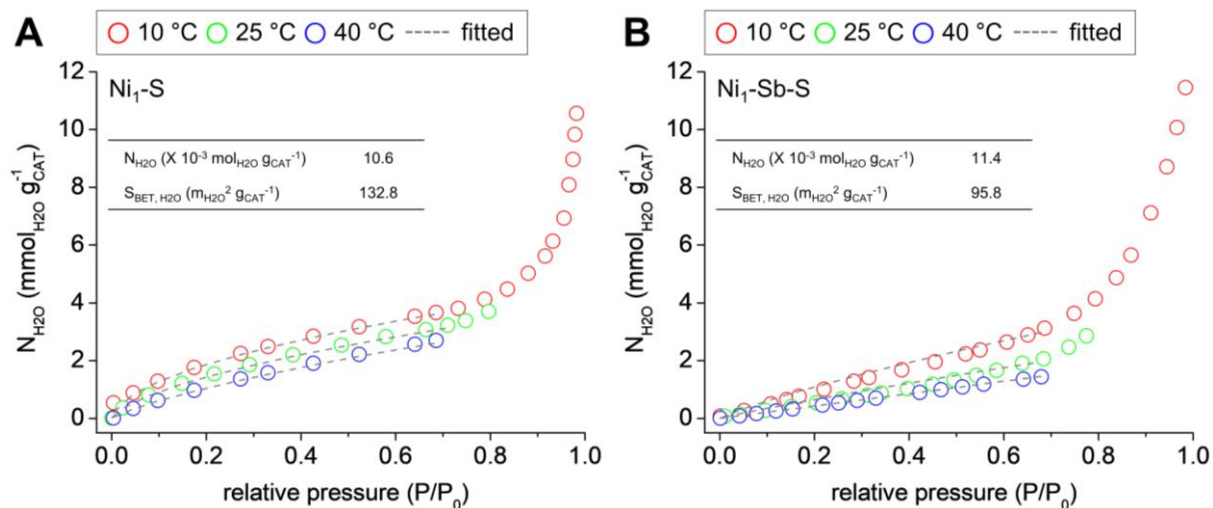

**Fig. S18.** H<sub>2</sub>O adsorption isotherms of Ni<sub>1</sub>-S (A) and Ni<sub>1</sub>-Sb-S (B). In (A-B), red, green, and blue empty circles denote H<sub>2</sub>O adsorption isotherms collected at 10 °C, 25 °C, and 40 °C, respectively, whereas gray dashed lines denote H<sub>2</sub>O adsorption isotherms simulated using Toth equation. In addition, inset tables contain the numbers of H<sub>2</sub>O adsorbed in a per-gram of the catalysts ( $N_{\text{H}_2\text{O}}$ ) at partial pressure ( $P/P_0$ ) of  $\sim 1.0$  and 10 °C alongside with H<sub>2</sub>O-accessible BET surface areas in a per-gram of the catalysts ( $S_{\text{BET, H}_2\text{O}}$ ) at 10 °C.

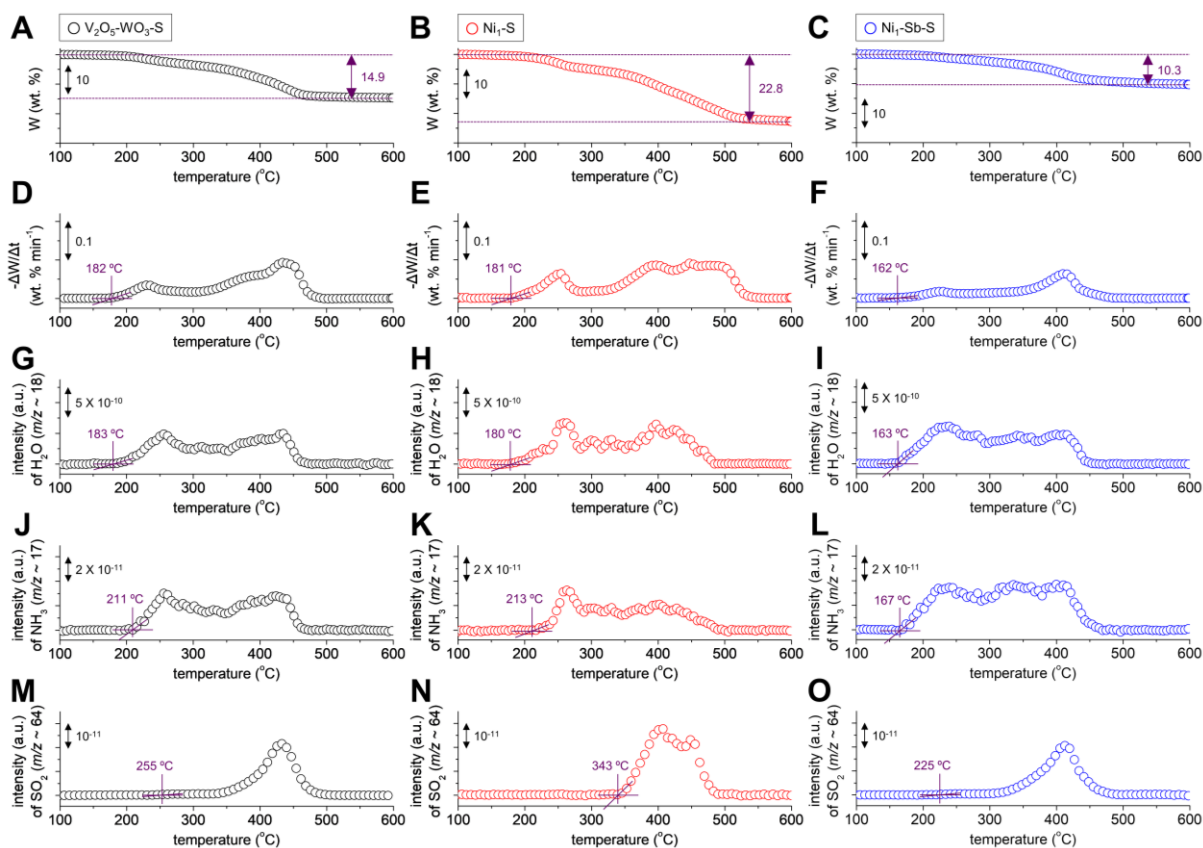

**Fig. S19.** Profiles of weight percent loss versus temperature (V<sub>2</sub>O<sub>5</sub>-WO<sub>3</sub>-S for A; Ni<sub>1</sub>-S for B; Ni<sub>1</sub>-Sb-S for C), the 1<sup>st</sup> derivative of weight percent loss with respect to time versus temperature (V<sub>2</sub>O<sub>5</sub>-WO<sub>3</sub>-S for D; Ni<sub>1</sub>-S for E; Ni<sub>1</sub>-Sb-S for F), and signals of H<sub>2</sub>O (V<sub>2</sub>O<sub>5</sub>-WO<sub>3</sub>-S for G; Ni<sub>1</sub>-S for H; Ni<sub>1</sub>-Sb-S for I), NH<sub>3</sub> (V<sub>2</sub>O<sub>5</sub>-WO<sub>3</sub>-S for J; Ni<sub>1</sub>-S for K; Ni<sub>1</sub>-Sb-S for L), and SO<sub>2</sub> (V<sub>2</sub>O<sub>5</sub>-WO<sub>3</sub>-S for M; Ni<sub>1</sub>-S for N; Ni<sub>1</sub>-Sb-S for O) released versus temperature for the catalysts poisoned with AS/ABS under an Ar. In (A-C), values shown with arrows denote the quantities of AS/ABS (wt. %) included in the poisoned catalysts. In (D-O), temperatures denoted the onsets, where the weight loss or H<sub>2</sub>O/NH<sub>3</sub>/SO<sub>2</sub> signal evolution was initiated. AS/ABS degradation conditions: flow rate of 50 mL min<sup>-1</sup>; ramping rate of 2 °C min<sup>-1</sup>.

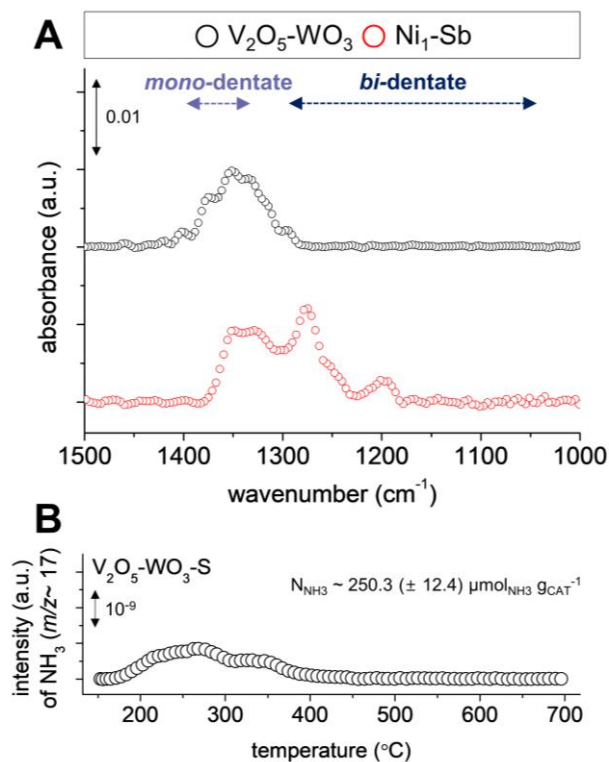

**Fig. S20.** (A) Background-subtracted *in situ*  $SO_2/O_2$ -DRIFT spectra of  $V_2O_5-WO_3$  and  $Ni_1-Sb$  exposed to  $SO_2/O_2/N_2$  at  $500\text{ }^{\circ}C$  with a ramping rate of  $10\text{ }^{\circ}C\text{ min}^{-1}$  and a total flow rate of  $200\text{ mL min}^{-1}$ . Background-subtracted *in situ*  $SO_2/O_2$ -DRIFT spectrum of  $Ni_1-Sb$  is re-plotted for comparison. (B)  $NH_3$ -TPD profile ( $NH_3$  signal versus temperature) of  $V_2O_5-WO_3-S$ .  $V_2O_5-WO_3-S$  surface chemisorbed  $NH_3$  at  $150\text{ }^{\circ}C$  and was then heated to  $700\text{ }^{\circ}C$  with a ramping rate of  $10\text{ }^{\circ}C\text{ min}^{-1}$ . In (B),  $N_{NH_3}$  indicates the number of  $NH_3$  adsorbed in a per-gram of  $V_2O_5-WO_3-S$  at  $150\text{ }^{\circ}C$ .

## References

1. J. Kim, D. W. Kwon, S. Lee and H. P. Ha, *Appl. Catal. B*, 2018, **236**, 314-325.
2. J. Kim, D. H. Kim and H. P. Ha, *J. Hazard. Mater.*, 2020, **397**, 122671.
3. S. Lee, J.-H. Lee, H. P. Ha and J. Kim, *Chem. Mater.*, 2022, **34**, 1078-1097.
4. J. Kim, D. H. Kim, J. Park, K. Jeong and H. P. Ha, *ACS Catal.*, 2022, **12**, 2086-2107.
5. H. J. An, D. H. Kim, H. P. Ha and J. Kim, *J. Mater. Chem. A*, 2021, **9**, 8350-8371.
6. J. Kim, K. B. Nam and H. P. Ha, *J. Hazard. Mater.*, 2021, **416**, 125780.
7. Y. Yang, Z. Qiu, G. Weng, H. Wang, Y. Li, B. Fan, X. Bai, Q. Zhang and C. Chen, *Adv. Funct. Mater.*, 2022, **32**, 2106828.
8. H. Ahn and C.-H. Lee, *Chem. Eng. Sci.*, 2004, **59**, 2727-2743.
9. D. Chen, X. Hu, L. Shi, Q. Cui, H. Wang and H. Yao, *Appl. Clay Sci.*, 2012, **59-60**, 148-151.
10. D. H. Kim, S.-H. Oh, H. P. Ha, Y.-C. Joo and J. Kim, *Appl. Surf. Sci.*, 2023, **614**, 156099.
11. M. Kim, J. Park, S. H. Kim, J.-H. Lee, K. Jeong and J. Kim, *Carbon*, 2023, **203**, 630-649.
12. Y. J. Choe, S. H. Kim, K. Jeong and J. Kim, *Chem. Eng. J.*, 2023, **455**, 140537.
13. Y. J. Choe, S. Lee, M. Kim, S. H. Kim, I.-S. Choi, K. Jeong and J. Kim, *Sep. Purif. Technol.*, 2023, **310**, 123146.
14. J. Kim, Y. J. Choe and S. H. Kim, *Chem. Eng. J.*, 2021, **413**, 127550.
15. J. Kim, Y. J. Choe, S. H. Kim, I.-S. Choi and K. Jeong, *JACS Au*, 2021, **1**, 1158-1177.
16. Y. J. Choe, S. H. Kim, K. Jeong and J. Kim, *Chem. Eng. J.*, 2022, **455**, 140537.
17. J. Kim, S. Lee and H. P. Ha, *ACS Catal.*, 2021, **11**, 767-786.
